# Supplementary material for: Interannual Variability of Summer Surface Mass Balance and Surface Melting in the Amundsen Sector, West Antarctica
Source: Copernicus journal article supplement (doi:10.5194/tc-2019-109), 2019-05-24
Supplement: Supplementary file [file tc-2019-109-AC4-supplement.pdf]

# Interannual Variability of Summer Surface Mass Balance and Surface Melting in the Amundsen Sector, West Antarctica

Marion Donat-Magnin<sup>1</sup>, Nicolas C. Jourdain<sup>1</sup>, Hubert Gallée<sup>1</sup>, Charles Amory<sup>3</sup>, Christoph Kittel<sup>3</sup>, Xavier Fettweis<sup>3</sup>, Jonathan D. Wille<sup>1</sup>, Vincent Favier<sup>1</sup>, Amine Drira<sup>1</sup>, Cécile Agosta<sup>2</sup>.

<sup>1</sup>Université Grenoble Alpes/CNRS/IRD/G-INP, IGE, 38000, Grenoble, France

<sup>2</sup>Laboratoire des Sciences du Climat et de l'Environnement, IPSL/CEA-CNRS-UVSQ UMR 8212, CEA Saclay, F-91190, Gif-sur-Yvette, France

<sup>3</sup>F.R.S.-FNRS, Laboratory of Climatology, Department of Geography, University of Liège, B-4000 Liège, Belgium

*Correspondence to:* Marion Donat-Magnin (marion.donatmagnin@gmail.com)

## Abstract.

*Understanding the interannual variability of Surface Mass Balance (SMB) and surface melting in Antarctica is key to quantify the signal to noise ratio in climate trends, identify opportunities for multi-year climate predictions, and to assess the ability of climate models to respond to climate variability. Here we simulate summer SMB and surface melting from 1979 to 2017 using the regional atmospheric model MAR at 10 km resolution over the drainage basins of the Amundsen Sea glaciers in West Antarctica. Our simulations reproduce the mean present-day climate in terms of near-surface temperature (mean overestimation of 0.10 °C), near-surface wind speed (mean underestimation of 0.42 m s<sup>-1</sup>), and SMB (relative bias < 20% over Thwaites glacier). The simulated interannual variability of SMB and melting is also close to observation-based estimates.*

*For all the Amundsen glacial drainage basins, the interannual variability of summer SMB and surface melting are driven by two distinct mechanisms: high summer SMB tends to occur when the Amundsen Sea Low (ASL) is shifted southward and westward, while high summer melt rates tend to occur when ASL is shallower (i.e. anticyclonic anomaly). Both mechanisms create a northerly flow anomaly that increases moisture convergence and cloud cover over the Amundsen Sea and therefore favors snowfall and downward longwave radiation over the ice sheet. The part of interannual summer SMB variance explained by the ASL longitudinal migrations increases westward and reaches 40% for Getz. Interannual variation of the ASL relative central pressure is the largest driver of melt-rate variability, with 11 to 21% of explained variance (increasing westward). While high summer SMB and melt rates are both favored by positive phases of El Niño Southern Oscillation (ENSO), the Southern Oscillation Index (SOI) only explains 5 to 16 % of SMB or melt rates interannual variance in our simulations, with moderate statistical significance. However, the part explained by SOI in the previous austral winter is greater, suggesting that at least a part of the ENSO-SMB and ENSO-melt relationships in summer is inherited from the previous austral winter. Possible mechanisms involve sea-ice advection from the Ross Sea and intrusions of circumpolar deep water combined with melt-induced ocean overturning circulation in ice-shelf cavities. Finally, we do not find any correlation with the Southern Annular Mode (SAM) in summer.*

## 1 Introduction

From 1992 to 2017, the Antarctic continent has contributed  $7.6 \pm 3.9$  mm to the global mean sea level (Shepherd et al., 2018) and this contribution may increase over the next century (Ritz et al., 2015; DeConto and Pollard, 2016; Edwards et al., 2019). The recent mass loss from the Antarctic ice sheet is dominated by increased ice discharge into the ocean (Shepherd et al., 2018), but both surface mass balance (SMB) and ice discharge may significantly affect the Antarctic contribution to future sea level rise (Asay-Davis et al., 2017; Favier et al., 2017; Pattyn et al., 2018). Despite recent improvements of ice-sheet models motivated by newly available satellite products over the last 10-20 years, large uncertainties remain in both the SMB and ice dynamics projections, hampering our ability to accurately predict future sea level rise (Favier et al., 2017; Shepherd and Nowicki, 2017).

Largest ice discharge changes in Antarctica are observed in the Amundsen sector with an increase of 77% over the last decades (Mouginot et al., 2014). Current changes in the dynamics of glaciers flowing into the Amundsen Sea are dominated by ocean warming rather than changes in surface conditions over the ice sheet (Thoma et al., 2008; Pritchard et al., 2012; Turner et al., 2017; Jenkins et al., 2016, 2018). Increased oceanic melting can trigger marine ice sheet instability, leading to increased ice discharge, thinning ice, and retreating grounding lines (Weertman, 1974; Schoof, 2007; Favier et al., 2014; Joughin et al., 2014). In parallel, increased surface air temperature can lead to surface melting, subsequent hydrofracturing, and possibly to major thinning and retreat of outlet glaciers after the collapse of ice shelves (DeConto and Pollard, 2016). Surface melting, leading to meltwater ponding, drainage into crevasses and hydrofracturing, is thought to be the main cause of the Larsen ice shelves collapse over the last decades in the Antarctic Peninsula (van den Broeke, 2005; Scambos et al., 2009; Vaughan et al., 2003). While surface melting is currently limited to relatively rare events over the Amundsen Sea ice shelves (Nicolas and Bromwich, 2010; Trusel et al., 2012) and underlying reasons for melt ponds formation versus active surface drainage network remains unclear (Bell et al., 2018), the rapid surface air warming observed (Steig et al., 2009; Bromwich et al., 2013) and projected (Bracegirdle et al., 2008) in this region suggests that surface melting could increase in the future. Our study focuses on the two atmospheric-related aspects that can significantly affect the contribution of the Amundsen Sea sector to sea level rise, i.e., snowfall accumulation that is expected to increase in a warmer climate and therefore to reduce the mean sea level, and surface melting that could potentially induce more ice discharge and therefore increase the mean sea level.

Understanding the interannual variability of SMB and surface melting is key to (i) quantify the signal to noise ratio in climate trends, (ii) identify opportunities for seasonal predictions, and (iii) assess the capacity of climate models to respond to global climate variability. Furthermore, years with particularly strong surface (or oceanic) melting could trigger irreversible grounding line retreat without the need for a long-term climate trend. Interannual variability in the Amundsen Sea region is usually described in

terms of connections with the El Niño Southern Oscillation (ENSO), the Southern Annular Mode (SAM), and the Amundsen Sea Low (ASL). Our study revisits these connections through dedicated regional simulations based on the MAR model (Fettweis et al., 2017; Agosta et al., 2019). Hereafter, we start by reviewing recent literature on these climate connections.

75 The El Niño Southern Oscillation (ENSO ; Philander et al., 1989) is the leading mode of ocean and atmosphere variability in the tropical Pacific. It is the strongest climate fluctuation at the interannual timescale and can bring seasonal to multi-year climate predictability (e.g. Izumo et al., 2010). Global climate models predict an increasing number of extreme El Niño events in the future, with large global impacts (Cai et al., 2014, 2017). Interannual and decadal variability in the tropical Pacific affects air  
80 temperature (Ding et al., 2011), snowfall (Bromwich et al., 2000; Cullather et al., 1996; Genthon and Cosme, 2003), sea ice extent (Pope et al., 2017; Raphael and Hobbs, 2014) and upwelling of circumpolar deep water favoring ice-shelf basal melting (Dutrieux et al., 2014; Steig et al., 2012; Thoma et al., 2008) in West Antarctica. Recent studies found concurrences between El Niño events and summer surface melting over West Antarctic ice shelves (Deb et al., 2018; Nicolas et al., 2017; Scott et al., 2019). These  
85 connections are generally explained in terms of Rossby wave trains excited by tropical convection during El Niño events and inducing an anticyclonic anomaly over the Amundsen Sea (Ding et al. 2011). Paolo et al. (2018) reported a positive correlation between ENSO and the satellite-based ice-shelf surface height in the Amundsen Sea over 1994-2017. Based on a detailed study of the extreme El Niño/La Niña sequence from 1997 to 1999, these authors suggested that El Niño events could increase snow accumulation but,  
90 also increase ocean melting even more, thus leading to an overall ice shelf mass loss. The impact of ENSO was found to be stronger for the Dotson ice-shelf and eastward, and weaker for Pine Island and Thwaites (Paolo et al., 2018). However, the aforementioned studies were based on the analysis of few recent ENSO events, and did not account for the highly-variable properties of ENSO over multi-decadal periods (e.g. Deser et al., 2012; Newman et al., 2011).

95 The Southern Annular Mode (SAM; Hartmann and Lo, 1998; Limpasuvan and Hartmann, 1999; Thompson and Wallace, 2000) is the dominant mode of atmospheric variability in the Southern hemisphere, and corresponds to a variation of the strength and position of the circumpolar westerlies. Over the last three to five decades, the SAM has exhibited a positive trend, i.e., westerly winds have been strengthening and shifting poleward (Chen and Held, 2007; Jones et al., 2016; Marshall, 2003). Medley  
100 and Thomas (2019) found similar patterns for the SAM trends and the reconstructed snow accumulation trend over 1801-2000. By contrast, the temperatures above the melting point over the Amundsen ice shelves were found to be largely insensitive to the polarity of the SAM (Deb et al., 2018). The SAM phase has also been suggested to influence the ENSO teleconnection to the south Pacific: in-phase ENSO and SAM events (i.e. El Niño/SAM- or La Niña/SAM+) favor anomalous transient eddy momentum fluxes  
105 in the Pacific that make the ENSO teleconnection to the South Pacific stronger than average (Fogt et al., 2011).

The Amundsen sea low (ASL ; Raphael et al., 2016; Turner et al., 2013a) is a dynamic low-pressure system located in the Pacific sector of the Southern Ocean and moving across the Ross, Amundsen, and Bellingshausen seas. The ASL is important regionally and variations of its central pressure and position respectively reflect the second and third leading modes of the Southern hemisphere climate respectively (Scott et al. 2019 their figure 3). A westward shift of the ASL induces northerly flow anomalies over the Amundsen Sea, leading to warmer conditions and increased moisture transport over the ice sheet (Hosking et al., 2013; Thomas et al., 2015; Hosking et al., 2016; Raphael et al., 2016; Fyke et al., 2017). Variations in the ASL central pressure also largely impact the West Antarctic climate: anti-cyclonic anomalies near 120°W lead to marine air intrusion over the ice sheet, thereby increasing cloud cover, longwave downward radiations and therefore surface air temperature over WAIS (Scott et al., 2019). While a deepening of the ASL is predicted for the twenty-first century in response to greenhouse gas emissions, its high regional variability makes future changes of the ASL difficult to predict (Hosking et al., 2016; Turner et al., 2009).

Importantly, ENSO and SAM are not independent from each other and both modes of climate variability impact the ASL (Fogt and Wovrosh, 2015). SAM influences the ASL central pressure since it affects the mean sea level pressure over Antarctica (Turner et al., 2013a). The second and third leading modes of variability in the South Pacific have been suggested to be affected by Rossby wave trains induced by tropical convection anomalies (Mo and Higgins, 1998). In terms of ASL, it corresponds to a migration further west (east) during the La Niña (El Niño), but the difference has a low statistical significance (Turner et al., 2013b). Scott et al. (2019) recently reported that El Niño conditions favored blocking in the Amundsen Sea as well as a negative SAM phase, both leading to warm surface air anomalies in West Antarctica.

In this study we revisit the influence of ENSO, SAM and ASL on summer SMB and melting over the drainage basins of the Amundsen sector in West Antarctica for the 1979-2017 period. While the summer focus on melt rates is obvious, SMB in DJF only represents 15% of the annual SMB. It is nonetheless interesting to analyze the similarities and differences in what drives SMB and melting, and the modes of variability and their teleconnections to the Amundsen Sea region both have strong seasonal characteristics, so that each season needs to be considered separately. To do so, we simulate the surface conditions of the Amundsen Sea region over 1979-2017 using the polar-adapted regional atmospheric model MAR forced by the ERA-Interim reanalysis. Section 2 describes the methodology followed in the study and presents the model and observations used for comparison. The model results are analyzed and evaluated against observations in Section 3, after evaluating the model skills (section 3.1), we analyze and discuss our results on the potential impact of large-scale climate variabilities on the SMB and melting in section 3.2 and 4. The conclusions are provided in Section 5.

## 2 Material and Method

### 2.1 Model

To estimate SMB and surface melt over the Amundsen sector we use the regional atmospheric model  
145 MAR (Gallée and Schayes, 1994) and specifically the version 3.9.3 (<http://mar.cnrs.fr>, last access: 25  
September 2019). The model solves the primitive equations under the hydrostatic approximation. It solves  
conservation equations for specific humidity, cloud droplets, rain drops, cloud ice crystals and snow  
particles (Gallée, 1995; Gallée and Gorodetskaya, 2010). MAR represents coupled interactions between  
the atmospheric surface boundary layer and the snowpack using the Soil Ice Snow Vegetation  
150 Atmosphere Transfer (SISVAT) originally developed by De Ridder and Gallée (1998). The snow–ice part  
of SISVAT includes submodules for surface albedo, meltwater percolation and refreezing, and snow  
metamorphism based on an early version of the CROCUS model (Brun et al., 1992). MAR has been  
largely evaluated in polar regions (e.g. Amory et al., 2015; Gallée et al., 2015; Lang et al., 2015; Fettweis  
et al., 2017; Kittel et al., 2018; Agosta et al., 2019; Datta et al., 2019).

155 Our domain includes the drainage basins of the Amundsen glaciers and a large part of the  
Amundsen Sea until 65°S. It covers an area of 2800 x 2400 km at 10 km horizontal resolution (Fig.1) and  
24 vertical sigma levels located from approximately 1 m to 15500 m above the ground. We use 30 snow  
layers, resolving the 20 first meters of the snowpack, with a fine vertical resolution at the surface (1 mm)  
increasing with depth, snow layer thickness varies dynamically depending on the physical properties of  
160 overlying snow layer properties. If neighboring layers get similar properties then layers are associated  
together. The radiative scheme and cloud properties are the same as in Datta et al. (2019) and the surface  
scheme including snow density and roughness are the same as in Agosta et al. (2019). The model is forced  
by ERA-interim reanalysis (Dee et al., 2011), which performs well over Antarctica (Bromwich et al.,  
2011; Huai et al., 2019), at 6 hourly temporal resolution and relaxed over ~400km laterally (pressure,  
165 wind, temperature, specific humidity, the relaxation zone is shown in Fig.1), at the top (i.e. above 10 km)  
of the troposphere (temperature, wind), and at the surface (sea ice concentration, sea surface temperature).  
The Bedmap2 surface elevation dataset is used for the ice-sheet topography (Fretwell et al., 2013). The  
snowpack density and temperature are initialized from the pan-Antarctic simulation from Agosta et al.  
(2019). Drifting snow is relatively infrequent in the Amundsen region (Lenaerts et al., 2012) so that the  
170 drifting snow module has been switched off in our configuration, similarly as in Agosta et al. (2019).

In section 3.2 we provide the SMB constituents averaged over individual drainage basins.

### 2.2 Antarctic surface observations

We make use of meteorological data from the SCAR database including observations from the Italian  
175 Antarctic Research Program (<http://www.climantartide.it>, last access: 25 September 2019), the Antarctic

Meteorological Research Center (AMRC program) (<http://amrc.ssec.wisc.edu/>, last access: 25 September 2019) and the Australian Antarctic automatic weather station (AWS) dataset (<http://aws.acecrc.org.au/>, last access: 25 September 2019). Among the 243 AWS available over Antarctica since 1980, we selected stations located no more than 15 km from the closest continental MAR grid point. For each location, modelled values (surface pressure, near-surface temperature and near-surface wind speed) are computed as the average-distance-weighted value of the four nearest continental grid points. A second selection criterion is also applied in order to reduce comparison errors due to the difference between the model surface elevation and the actual AWS elevation: we only retain observations with an elevation difference lower than 250 m. This two-stage selection leaves 41 suitable AWS in our domain (Fig. 1).

To evaluate the simulated SMB, we use airborne-radar data from Medley et al. (2013, 2014) covering the period 1980-2011. These data were collected through the NASA's Operation Icebridge campaign over the Thwaites and Pine Island basins. They are based on the CRISIS radar (Center for Remote Sensing of Ice Sheets), which is an ultra-wideband radar system able to measure the stratigraphy of the upper 20 – 30 m of the snowpack with few centimeters in vertical resolution. Airborne-radar data were verified with firn core accumulation records. To evaluate the SMB regional pattern at a broader scale, we also compared the simulated SMB with the 124 firn cores gathered in the GLACIOCLIM-SAMBA dataset thoroughly described by Favier et al., (2013) and updated by Wang et al., (2016).

To evaluate simulated surface melt, we use satellite-derived estimates of surface meltwater production over 1999-2009 from Trusel et al., (2013), provided at 4.45 km resolution, and based on the QuickSCAT backscatter and calibrated with in-situ observations. We also use data from Nicolas et al. (2017) who provide the number of melt days at 25 km resolution over Antarctica. This product is based on passive microwave observations from the Scanning Microwave Multichannel Radiometer (SMMR), the Special Sensor Microwave/Imager (SSM/I), and the Special Sensor Microwave Imager Sounder (SSMIS) spaceborne sensors, and covers the 1978-2017 period. For a given grid cell and a given day, melt is assumed to occur as soon as one of the two daily observations of brightness temperature exceeds a threshold value. As the identification of melt days may be sensitive to the algorithm, we also use the dataset from Picard et al. (2007), extended to 2018 (<http://pp.ige-grenoble.fr/pageperso/picardgh/melting/>, last access: 25 September 2019). This dataset is also based on SMMR and SSMI, but uses the algorithms from Torinesi et al. (2003) and Picard and Fily (2006) to retrieve melt days. It is provided as daily melt status at 25km resolution over the Antarctic continent from 1979 to 2018.

### 2.3 Climate indices

To describe the ENSO, we use the Southern Oscillation Index (SOI) index from the Global Climate Observing System (GCOS) Working Group on Surface Pressure (Ropelewski and Jones, 1987; [https://www.esrl.noaa.gov/psd/gcos\\_wgsp/Timeseries/SOI/](https://www.esrl.noaa.gov/psd/gcos_wgsp/Timeseries/SOI/), last access: 25 September 2019). The SOI

index corresponds to the normalized pressure difference between Tahiti and Darwin based on observations. The Rossby wave trains connecting the Equatorial Pacific to Antarctica are expected to develop within a few weeks in response to ENSO anomalies (e.g. Hoskins and Karoly, 1981; Mo and Higgins, 1998; Peters and Vargin, 2015), so we first use the synchronous (DJF, i.e. December-January-February) SOI index in section 3. The lagged relationship to ENSO is discussed in section 4, where we use other 3-month averages of SOI such as JJA (June-July-August). SOI is preferred to NINO3.4 because it gives slightly stronger correlations with the variability in the Amundsen Sea region (as also found by Scott et al., 2019 and Holland et al., 2019, but very similar results were obtained using NINO3.4 (not shown)).

We use the SAM index from NOAA/CPC (<https://stateoftheocean.osmc.noaa.gov/atm/sam.php>, last access: 25 September 2019) to describe the primary mode of atmospheric variability in the Southern Ocean (e.g., Marshall, 2003). The SAM index is calculated as the difference of mean zonal pressure between the latitudes of 40°S and 65°S based on NCEP-NCAR reanalysis which produces a SAM that is consistent with other reanalyses after 1979 (Gerber and Martineau, 2018). In the negative (positive) phase, the mean sea level pressure anomaly between the Antarctic and mid latitude is positive (negative) and leads to a weaker (stronger) polar jet. Thus, positive (negative) values of the SAM index correspond to stronger (weaker)-than-average westerlies over the mid-high latitudes (50°S-70°S) and weaker (stronger) westerlies in the mid-latitudes (30°S-50°S).

We use two other indices to describe the evolution of the migration and intensity variations of the Amundsen Sea Low (ASL). The datasets are provided by the British Antarctic Survey ([https://legacy.bas.ac.uk/data/absl/ASL-index-Version2-Seasonal-ERA-Interim\\_Hosking2016.txt](https://legacy.bas.ac.uk/data/absl/ASL-index-Version2-Seasonal-ERA-Interim_Hosking2016.txt), last access: 25 September 2019), and calculated from the ERA-Interim reanalysis. To describe the migration, we use the longitudinal position of the ASL defined as the position of the minimum pressure within the box 170°-298°E, 80°-60°S (Hosking et al., 2016), defined in degree East. A decrease in the longitudinal position index hence corresponds to a westward shift of the ASL. To describe the intensity of the ASL, we use the relative central pressure of the ASL calculated as the minimum pressure in the aforementioned box minus the average pressure over that box (Hosking et al. 2016). A more intense ASL (deeper depression) is therefore represented by a lower index.

The SAM and ASL indices are defined regionally, and we do not expect any lag with summer SMB, so these indices are therefore calculated as DJF averages. All the correlations are calculated using detrended time series.

The correlations between these four indices are indicated in Table 1. A significant anti-correlation is obtained between the SAM index and ENSO (i.e. -SOI) as previously reported by Fogt et al. (2011). There is no significant relationship between the ASL longitudinal position and ENSO or SAM, as previously reported by Turner et al., (2013a). The relative central pressure also varies independently from SAM, ENSO, and the ASL longitudinal position. Numerous previous studies used the absolute rather than

relative central pressure to characterize the ASL, but this index is strongly correlated to the SAM index and cannot be considered independently (Table 1). As proposed by Hosking et al. (2013), the ASL relative central pressure (i.e actual central pressure minus pressure over the AS sector) allows for a better understanding of West Antarctic climate as it removes the influence of large scale variability such as ENSO and SAM.

**Table 1: Correlation between climate indices (-SOI, SAM, ASL longitudinal position, ASL relative central pressure, ASL actual central pressure) in austral summer (December-January-February). Values in brackets represents the percentage of significance.**

| Statistical correlation (R)       | -SOI | SAM         | ASL Longitudinal position (°East) | ASL relative central pressure (hPa) | ASL actual central pressure (hPa) |
|-----------------------------------|------|-------------|-----------------------------------|-------------------------------------|-----------------------------------|
| -SOI                              |      | -0.45 (99%) | -0.22 (82%)                       | 0.00 (1%)                           | 0.40 (99%)                        |
| SAM                               |      |             | 0.18 (73%)                        | -0.25 (88%)                         | -0.88 (99%)                       |
| ASL Longitudinal position (°East) |      |             |                                   | -0.23(84%)                          | -0.15 (63%)                       |

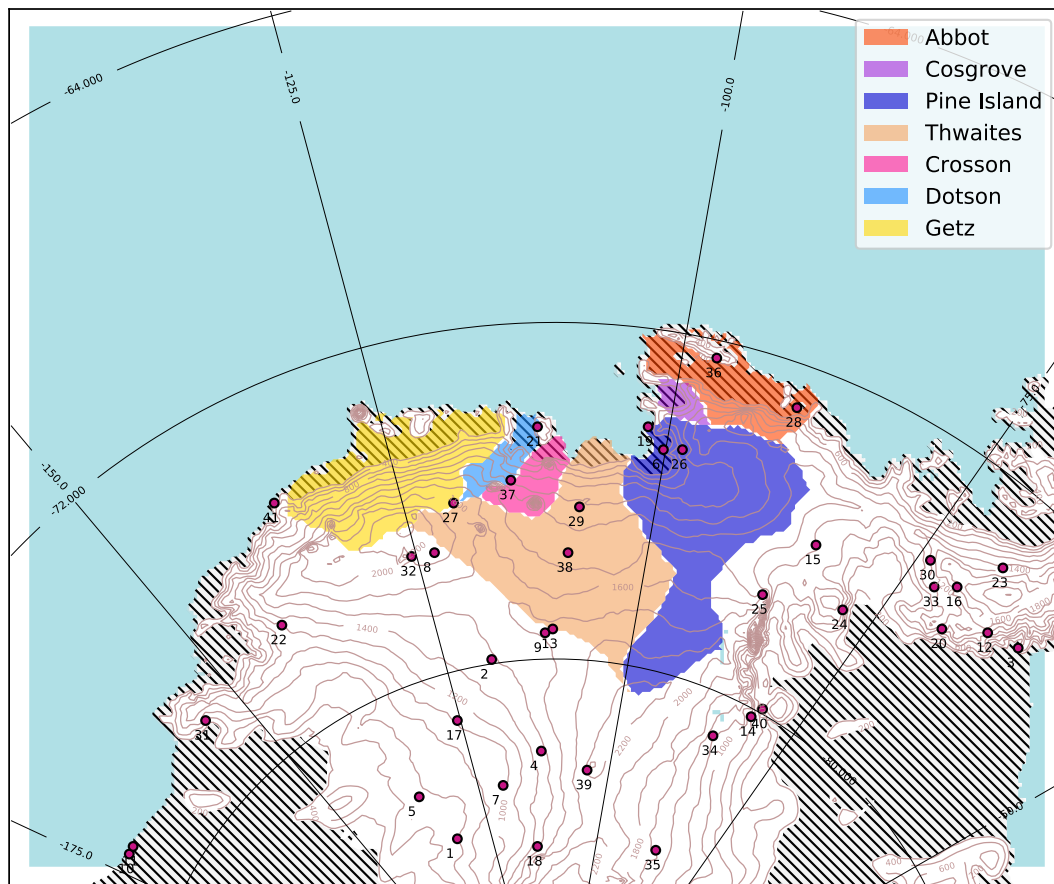

**Figure 1 : Simulation domain. The drainage basins (Rignot et al., 2019) under consideration in this paper are shaded in color and Automatic Weather Station (AWS) are indicated with red point. Hatched area represents ice-shelves and contour line the surface elevation (every 200m). Station name from 1 to 41 : (1) Brianna, (2) Byrd, (3) Cape Adams, (4) Doug, (5) Elizabeth, (6) Evans Knoll, (7) Harry, (8) Janet , (9) Kominko-Slade, (10) Martha2, (11) Martha1, (12) Mount McKibben, (13) Noel, (14) Patriot Hills, (15) Siple Dome, (16) Ski Hi, (17) Swithinbank, (18) Theresa, (19) Backer Island, (20) Bean Peaks, (21) Bear Peninsula, (22) Clarke Mountains, (23) Gomez Nunatak, (24) Haag Nunatak, (25) Howard Nunatak, (26) Inman Nunatak, (27) Kohler Glacier, (28) Lepley Nunatak, (29) Lower Thwaites Glacier, (30) Lyon Nunatak, (31) Mount Paterson, (32) Mount Sidley, (33) Mount Suggs, (34) Pirrot Hills, (35) Steward Hills, (36) Thurston Island, (37) Toney Mountain, (38) Up Thwaites Glacier, (39) Whitmore Mountains, (40) Wilson Nunatak, (41) Russkaya. Relaxation zone is shown in white (~400km).**



### 3 Results

270 We first evaluate the simulations with regard to observations (section 3.1). Then, we analyze the interannual variations in SMB and melting (section 3.2).

#### 3.1 Model evaluation

We first evaluate the near-surface temperature and near-surface wind speed in comparison to AWS data (Fig.2).

275 Our MAR configuration reproduces the daily near-surface temperatures, with a mean bias of 0.10 °C and a mean correlation of 0.93 for the whole year and 0.86 for summer months (Fig.2a). The statistics per station show a RMSE varying from 2.66 (10<sup>th</sup> percentile) to 4.15 °C (90<sup>th</sup> percentile) and a mean bias varying from -1.97 to 1.31 °C for the whole year (see supplementary material for more details).

The model tends to overestimate the lowest observed wind and underestimate the highest observed  
280 wind speeds (regressions in Fig.2b). The model agreement with observations is nonetheless good on average, with a mean underestimation of 0.42 m s<sup>-1</sup>. The statistics per station show a RMSE varying from 1.73 to 3.69 m s<sup>-1</sup>, and a mean bias varying from -3.08 to 0.85 m s<sup>-1</sup> for the whole year. The variance of the wind speed simulated by MAR is lower than observed. Less satisfactory results are generally found for the stations located on an island. This can be explained by the resolution of 10 km which is still too  
285 coarse to resolve small topographic features. For both, near-surface temperature and wind speed, the statistics for the summer period (December-January-February) are very similar to the statistics for the whole year. Our results show very similar model skills compared to other simulations in the same region (Deb et al., 2016; Lenaerts et al., 2017) or at coarser resolution over the whole ice sheet (Agosta et al., 2019).

290

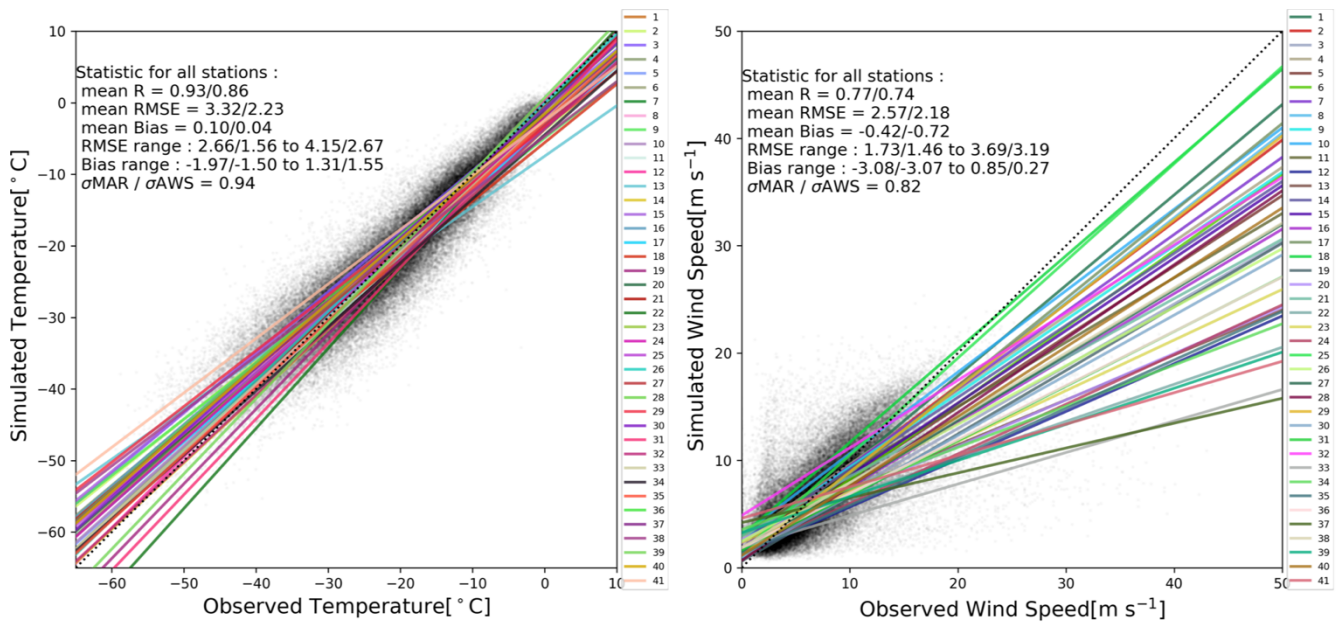

295 **Figure 2 : Scatter plots of observed vs. simulated near-surface temperature (a) and near-surface wind speed (b) for the selected**  
**AWS (see corresponding locations and names in Fig. 1). The statistics, including Root Mean Square Error (RMSE), correlation**  
**(R), bias, and standard deviations ( $\sigma$ ), are calculated for individual stations and provided as multi-station mean over the whole**  
**year / over the summer months (December-January-February). The range of RMSE and biases across individual stations is also**  
**indicated and RMSE corresponds to the 10<sup>th</sup> percentile and the 90<sup>th</sup> percentile. The lines represent least-mean-square linear fit**  
**between simulated data and observations. The complete statistical analyses for individual AWS are provided in Supplementary**  
**material (Table S1-S2).**

300

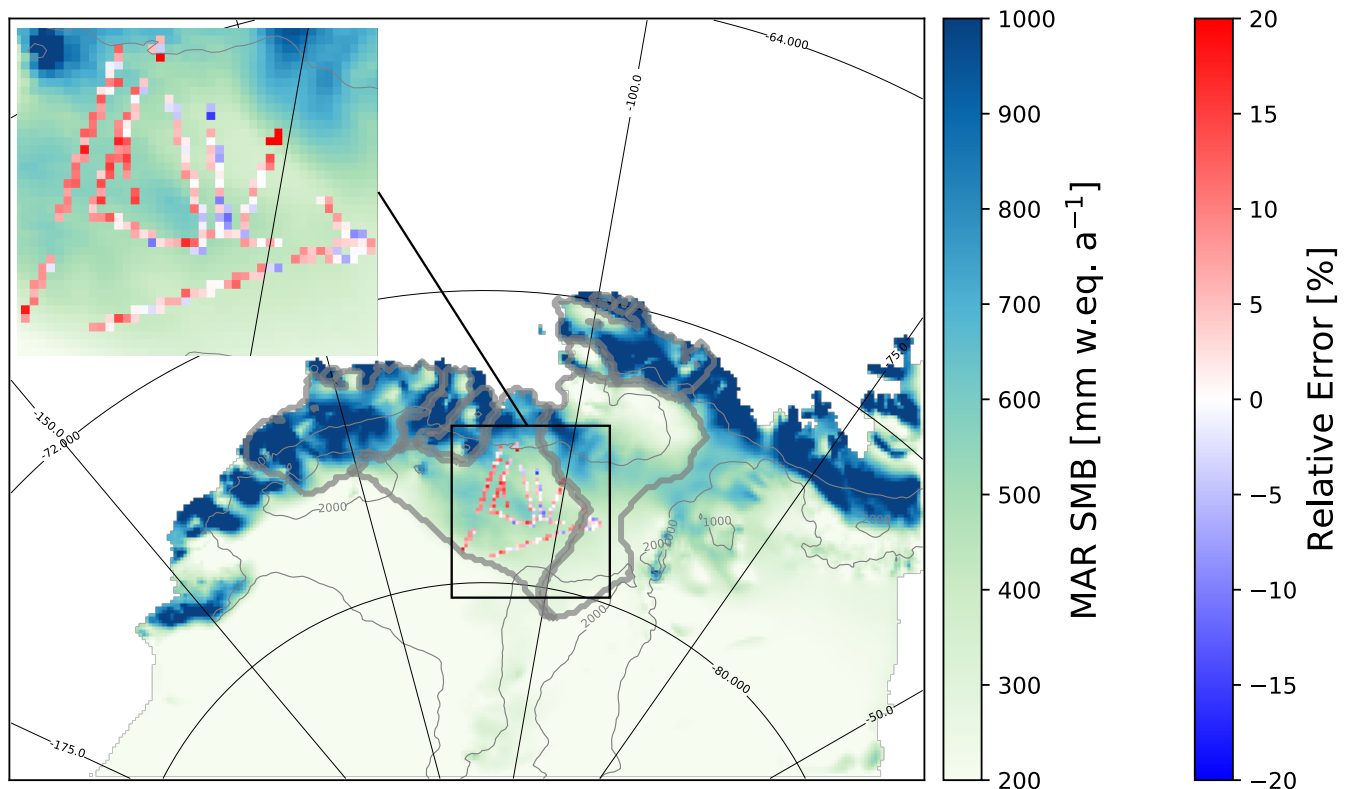

305 **Figure 3 : Annual mean (1979-2017) simulated SMB (blue-green scale) and relative error of the simulated SMB compared to**  
**the airborne-radar data from Medley et al. (2013, 2014) (blue-red color bar). Grey contours indicate the surface height (every**  
**1000m). The drainage basins under consideration are shaded with the same colors as in Fig.1.**

310 We now assess the simulated SMB compared to the SMB from Medley et al., (2013, 2014) derived  
from airborne radar over the period 1980-2011. The simulated SMB is well captured by MAR with a  
mean relative overestimation of approximately 10% over the Thwaites basin, and local errors smaller than  
20% at all locations (Fig.3). The interannual variability is also well simulated by MAR with a correlation  
of 0.90 (Fig.4). In order to have a broad overview of the SMB evaluation, we also compared the simulated  
315 SMB with the GLACIOCLIM-SAMBA dataset (Favier et al., 2013) over the Ross and Siple Coast sector  
(See Fig.S1 in Supplementary material). The bias of simulated SMB compared to observation is less than  
10 mm w.e a<sup>-1</sup> and local bias can reach 30 mm w.e a<sup>-1</sup>. However, the relative bias between GLACIOCLIM-  
SAMBA dataset and simulated SMB is more pronounced with only 44% of GLACIOCLIM-SAMBA  
sites show a relative error with simulated SMB lower than 20%.

320

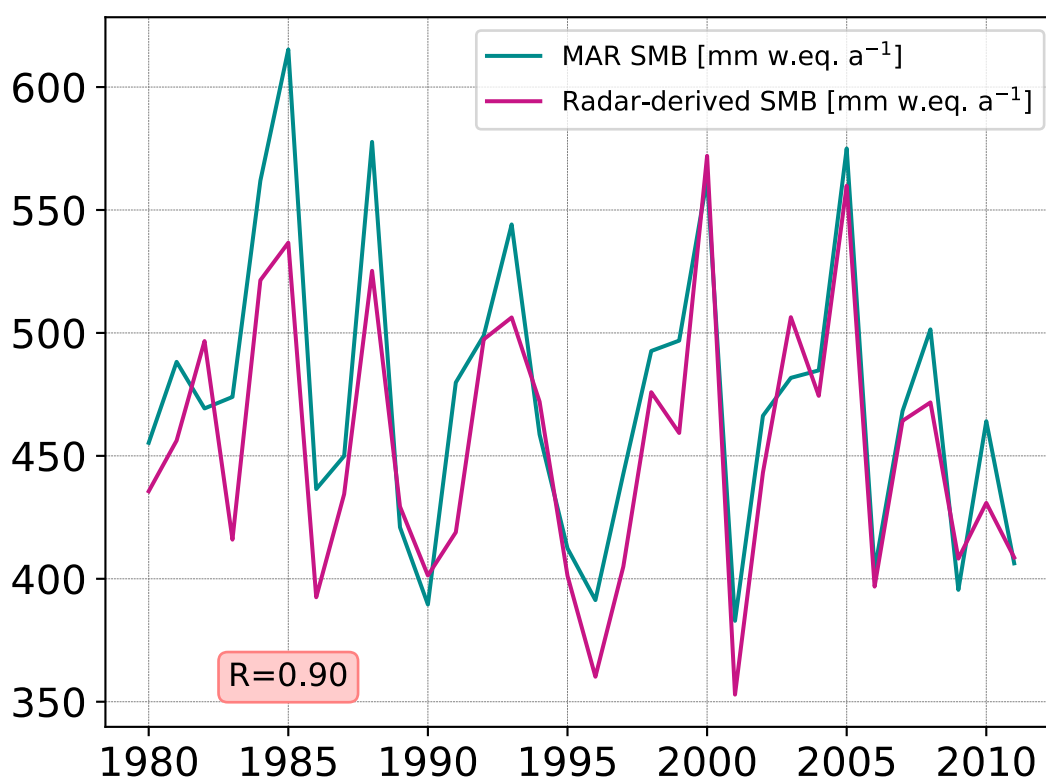

Figure 4 : Timeseries of the annual mean (January to December) simulated and radar-derived SMB from 1980 to 2011 over the Thwaites basins.

325

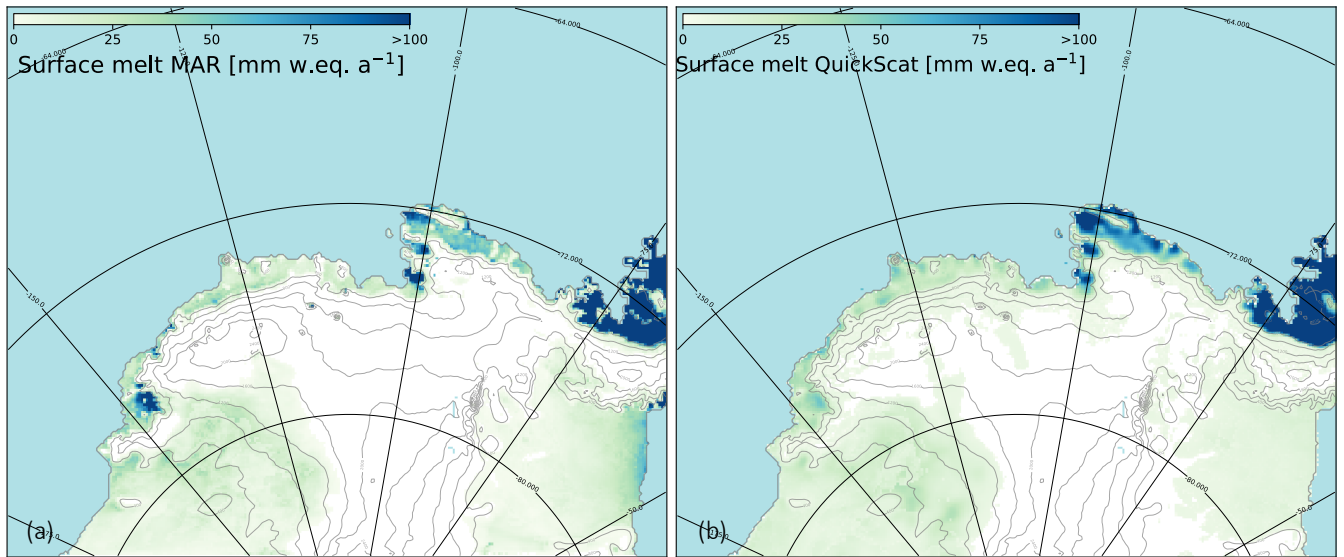

Figure 5 : Annual surface melt rate (a) simulated by MAR over 1999-2009, and (b) derived from QuickScat satellite data over the same period (Trusel et al. 2013) and interpolated over the MAR grid.

330

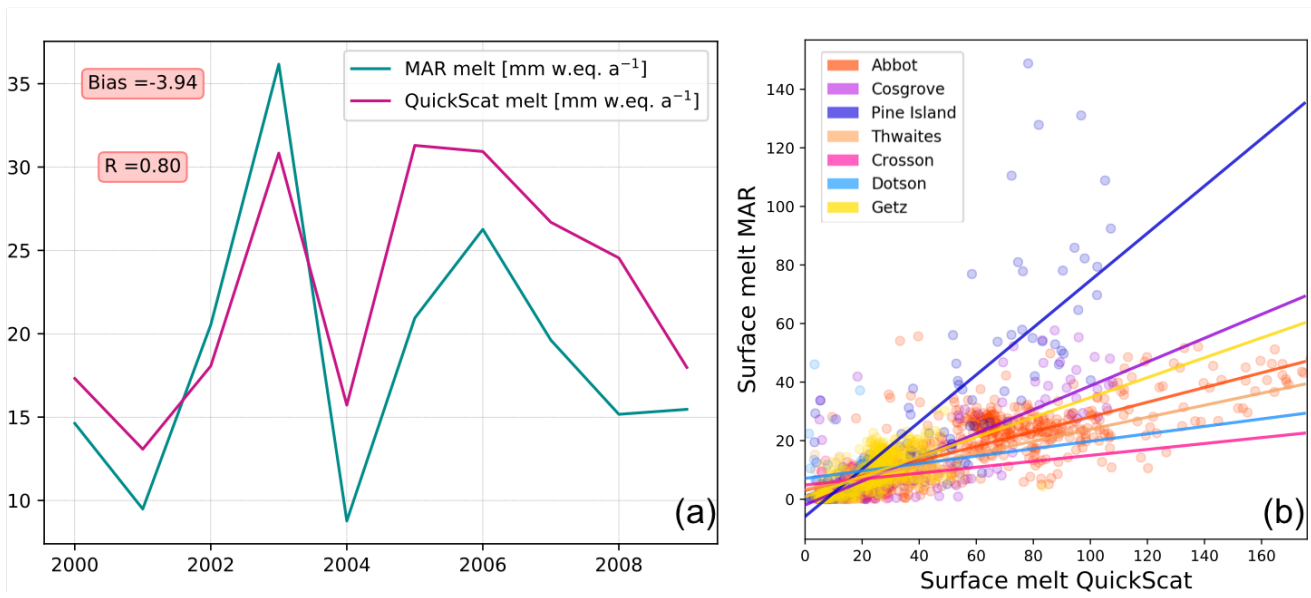

Figure 6 : (a) Time series of surface melt rates in mean over the model domain derived from satellite data and simulated by MAR, years labelled on the X-axis refer to the second year of a given austral summer (e.g., summer 1999–2000 is labelled 2000). and (b) Surface melt modelled versus surface melt interpolated from satellite data (QuickScat) over drainage basins, (only where surface melt > 0 mm w.e. a<sup>-1</sup>) and over the period 1999-2009.

335

The areas of highest surface melt (> 100 mm w.e. a<sup>-1</sup>) are located near the coast and particularly over Abbot, Cosgrove, and the eastern part of Pine Island ice shelf, while more extreme values (>200 mm w.e. a<sup>-1</sup>) are found near the Peninsula in both simulated and observed datasets (Fig. 5). Even if the simulated and observed patterns are similar, the simulated surface melt is a factor of two lower than observations locally (e.g. over Abbot ice shelf and the Peninsula). While the interannual melt rate variability is well reproduced with a correlation of 0.80, the surface melt rate simulated by MAR is underestimated by 18% on average compared to QuickScat estimates (Fig.6a). Surface melt rate over Pine Island basins is well simulated by MAR (Fig.6b) with R equal to 0.80 compared to drainage basins with low surface melt (i.e. Crosson, Dotson) where R is equal to 0.14 and 0.24 respectively. This melt underestimation, particularly

340

345

pronounce over drainage basins with low surface melt rate, could be explained by the slight overestimation of the snowfall accumulation (10-20%), as the presence of a fresh snow layer of high albedo overlying snow or ice layers of lower albedo likely reduces melt. MAR presents slight overestimation over Getz ice-shelf (Fig.5) possibly explained by wind advection, föhn effect, or even snow metamorphism simulated by MAR. Further work is needed to understand such local biases. MAR is fully driven by low resolution ERA-Interim sea ice cover and temperature therefore possible underestimation of the presence of polynyas can also play a role in the melt biases.

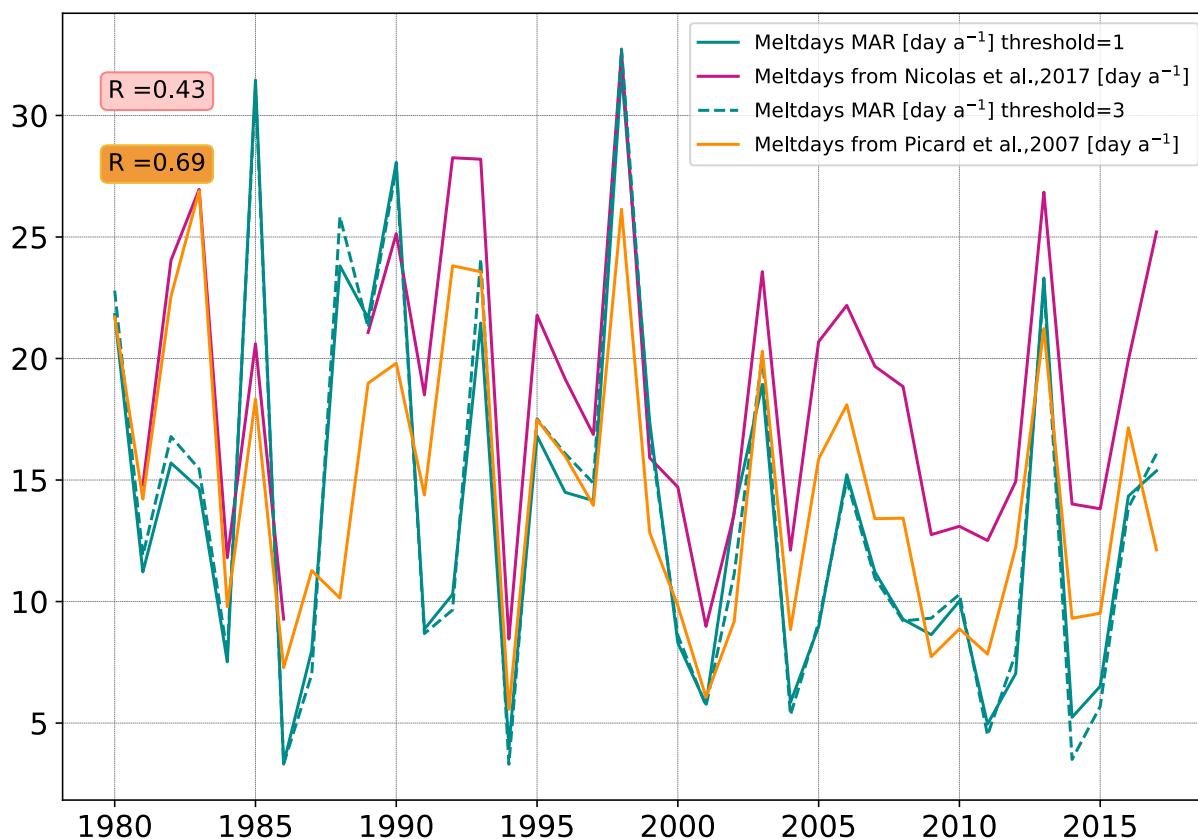

Figure 7 : Time series of number of melt days per summer (DJF) averaged over the part of the domain with more than 3 melt days per year on average (which approximately corresponds to the ice shelf zone), derived from two satellite products and simulated by MAR (defined using a melt-rate threshold of either 1 or 3 mm w.e.day<sup>-1</sup>).

We also compare the number of melt days to the satellite products from Nicolas et al. (2017) and Picard et al. (2007). To avoid no melt days area in the timeseries computation we use the area where annual number of melt days for each dataset is more than 3 melt days per year, that corresponds approximately to the ice shelf zone. As with the amount of surface melt, the number of melt days over the domain is underestimated by MAR (Fig.7). The amplitude of the underestimation is not very sensitive to the melt-rate threshold used to define a melt day in MAR. A threshold of 1 mm w.e. day<sup>-1</sup> (as in Datta et al., 2019) gives a mean underestimation of 4.8 days per year compared to observation from Nicolas et al. (2017), while a threshold 3 mm w.e. day<sup>-1</sup> (as in Deb et al., 2018; Lenaerts et al., 2017) gives a mean

underestimation of 4.9 days per year. This underestimation is less pronounced (0.8 to 0.9 day per year depending on the threshold) when using Picard et al. (2007) as a reference. The interannual variability in the number of melt days is reproduced with correlations of 0.69 and 0.43 to the two satellite products (Fig. 7). Previous study on Antarctic Peninsula also found that MAR melt occurrence is comparable to satellite products, but slightly underestimated over the Western coast of the Peninsula (Datta et al., 2019).

Overall, MAR well simulates the interannual variability of the Amundsen sector, and we are now going to use these simulations to investigate the drivers of interannual variability of SMB and surface melting.

### 3.2 Drivers of summer interannual variability

In this subsection, we first investigate the large-scale conditions leading to interannual anomalies in summer SMB or surface melting. For a sake of clarity, we only consider the Pine Island and Thwaites basin (together) as a first approach. To identify large-scale conditions leading to high (low) SMB, we calculate composites defined as the average of summers presenting a SMB greater than the 85<sup>th</sup> (lower than the 15<sup>th</sup>) interannual percentile, and we proceed similarly for surface melt composites. We choose the 85<sup>th</sup> and 15<sup>th</sup> percentiles to optimize the signal-to-noise ratio.

385

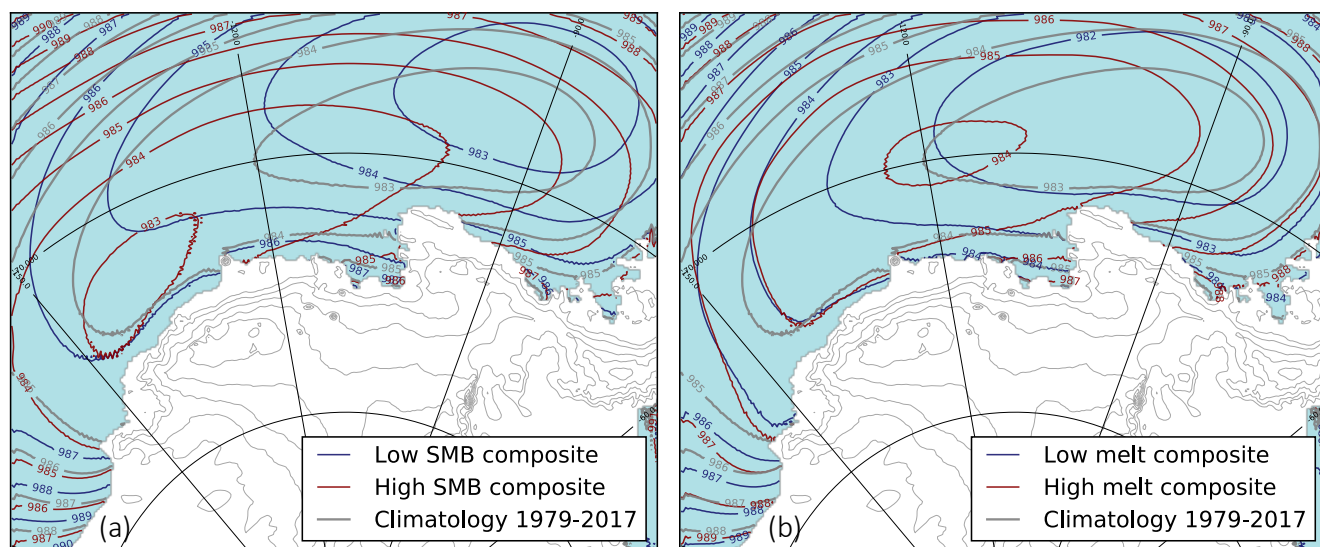

Figure 8 : Summer sea surface pressure composites for high/low SMB (a) and high/low surface melt (b). The ice-sheet height is indicated by thin grey contours (every 500m).

390

Sea surface pressure composites show that distinct mechanisms affect the interannual variability of summer SMB and surface melting (Fig. 8). Summers with high SMB are on average characterized by a far westward (by  $\sim 30^\circ$ ) and southward (by  $3-4^\circ$ ) migration of the ASL center, while the reverse migration is found for summers with low SMB although with a smaller displacement ( $\sim 15^\circ$  eastward). In contrast, years with high surface melt rates are characterized with a much smaller ASL migration and no migration

395

is found for years with low surface melt rates, but the pressure gradients differ between the high and low composites. Therefore, we hereafter consider the variability of SMB and surface melting separately.

On average, low-SMB summers are characterized by a northward and eastward ASL migration (shown through a dipole in the 500hPa normalized geopotential composite in Fig. 9a,c), which is associated with an offshore surface wind anomaly over the glaciers of the Amundsen sector (Fig. 9e). Conversely, high-SMB summers are characterized by a southward and westward ASL migration (Fig. 9b,d), which is associated with an onshore surface wind anomaly over the glaciers of the Amundsen sector (Fig. 9f). The circulation anomalies typical of high-SMB summers favor the southward transport of precipitable water as indicated by the composites of integrated vapor transport (Fig.10a,b). Increased moisture transport towards the Amundsen Sea Embayment leads to denser cloud cover (Fig.10c,d) and increased SMB.

On average, high-melt summers are also associated with increased moisture transport towards the Amundsen Sea Embayment, and conversely for low-melt summers (Fig.11a,b), but the mechanism is somewhat different from the case of SMB. The ASL migration during high-melt summers is much smaller than for the high-SMB summers (Fig.8b). Summers with high surface melt rates show a significant increase in the 500 hPa geopotential height over the Bellingshausen Sea (Fig. 12b), i.e. an anticyclonic anomaly, and small westward ASL migration as shown in the 500hPa normalized geopotential composite (Fig. 12d). This anomaly is against the ASL mean circulation and creates a northerly flow anomaly over the ice sheet in the Amundsen sector (Fig. 12e,f). This anticyclonic anomaly was described by Scott et al. (2019) in terms of enhanced blocking activity. As in Scott et al. (2019), we find that high-melt summers are associated with denser cloud cover (Fig.11c,d), increased downward longwave radiation (Fig.11e,f), and therefore surface air warming, while the opposite occurs for low-melt summers. Composites of sensible heat flux indicate that heat is lost by the snow surface to the atmosphere for high-melt summers, i.e. high melt summers are not caused by föhn events on average (Fig. S2).

420

**Table 2 : Annual surface mass balance decomposition for all drainage basins over 1979-2017 with SMB = Snowfall + Rainfall – Sublimation – Runoff**

| SMB component<br>[ mm w.e. a <sup>-1</sup> ] | Abbot | Cosgrove | Pine Island | Thwaites | Crosson | Dotson | Getz  |
|----------------------------------------------|-------|----------|-------------|----------|---------|--------|-------|
| Surface Mass balance                         | 959.5 | 660.5    | 429.1       | 504.5    | 867.7   | 895.0  | 843.0 |
| Sublimation                                  | 26.5  | 30.3     | 12.7        | 0.6      | 22.6    | 25.6   | 22.8  |
| Snowfall                                     | 981.9 | 688.5    | 441.3       | 505.0    | 887.6   | 919.5  | 864.9 |
| Rainfall                                     | 4.0   | 2.3      | 0.4         | 0.1      | 2.8     | 1.1    | 0.8   |
| Runoff                                       | 0.0   | 0.0      | 0.0         | 0.0      | 0.0     | 0.0    | 0.0   |
| Refreezing                                   | 36.4  | 27.0     | 4.3         | 1.0      | 6.2     | 7.2    | 9.6   |
| Surface melt                                 | 32.5  | 24.8     | 3.9         | 0.9      | 3.4     | 6.1    | 8.8   |

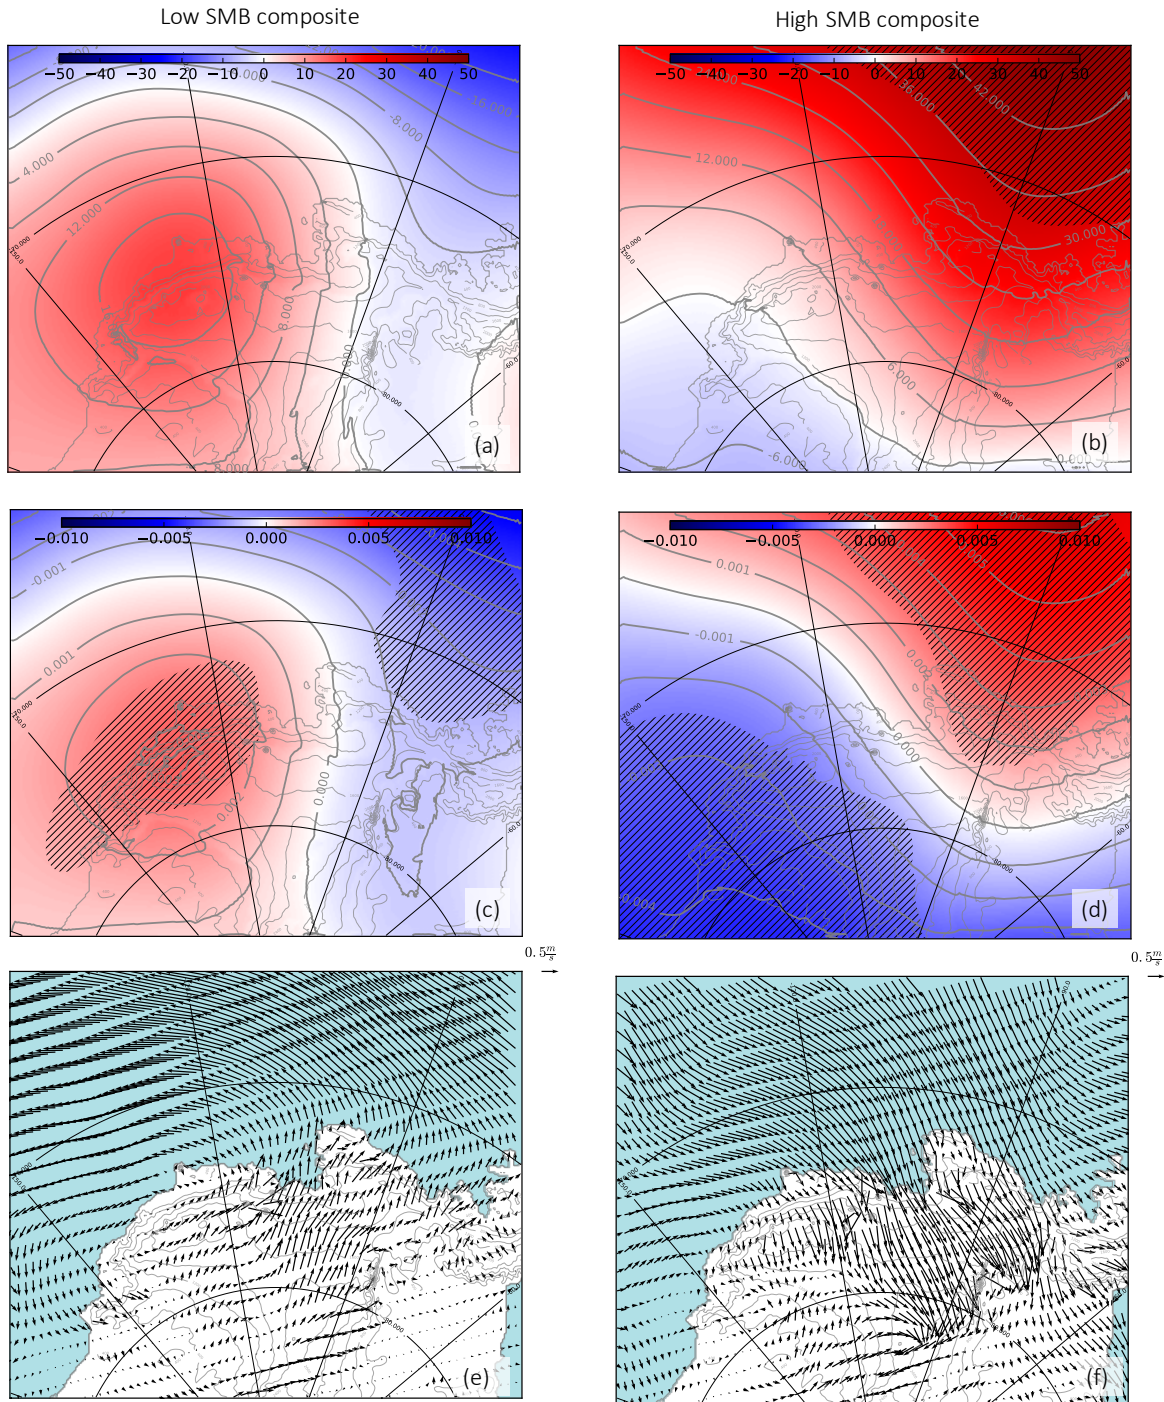

425

**Figure 9 :** (a,b) 500 hPa geopotential height (m), (c,d) 500 hPa geopotential height divided by the domain-averaged value for each season and (e,f) 10m wind ( $\text{m s}^{-1}$ ) anomalies during low-SMB summers (left) and high-SMB summers (right). Anomalies are calculated as high/low composites minus the climatology over 1979-2017. Hatched area represents significance >90% calculated with a *t*-test.



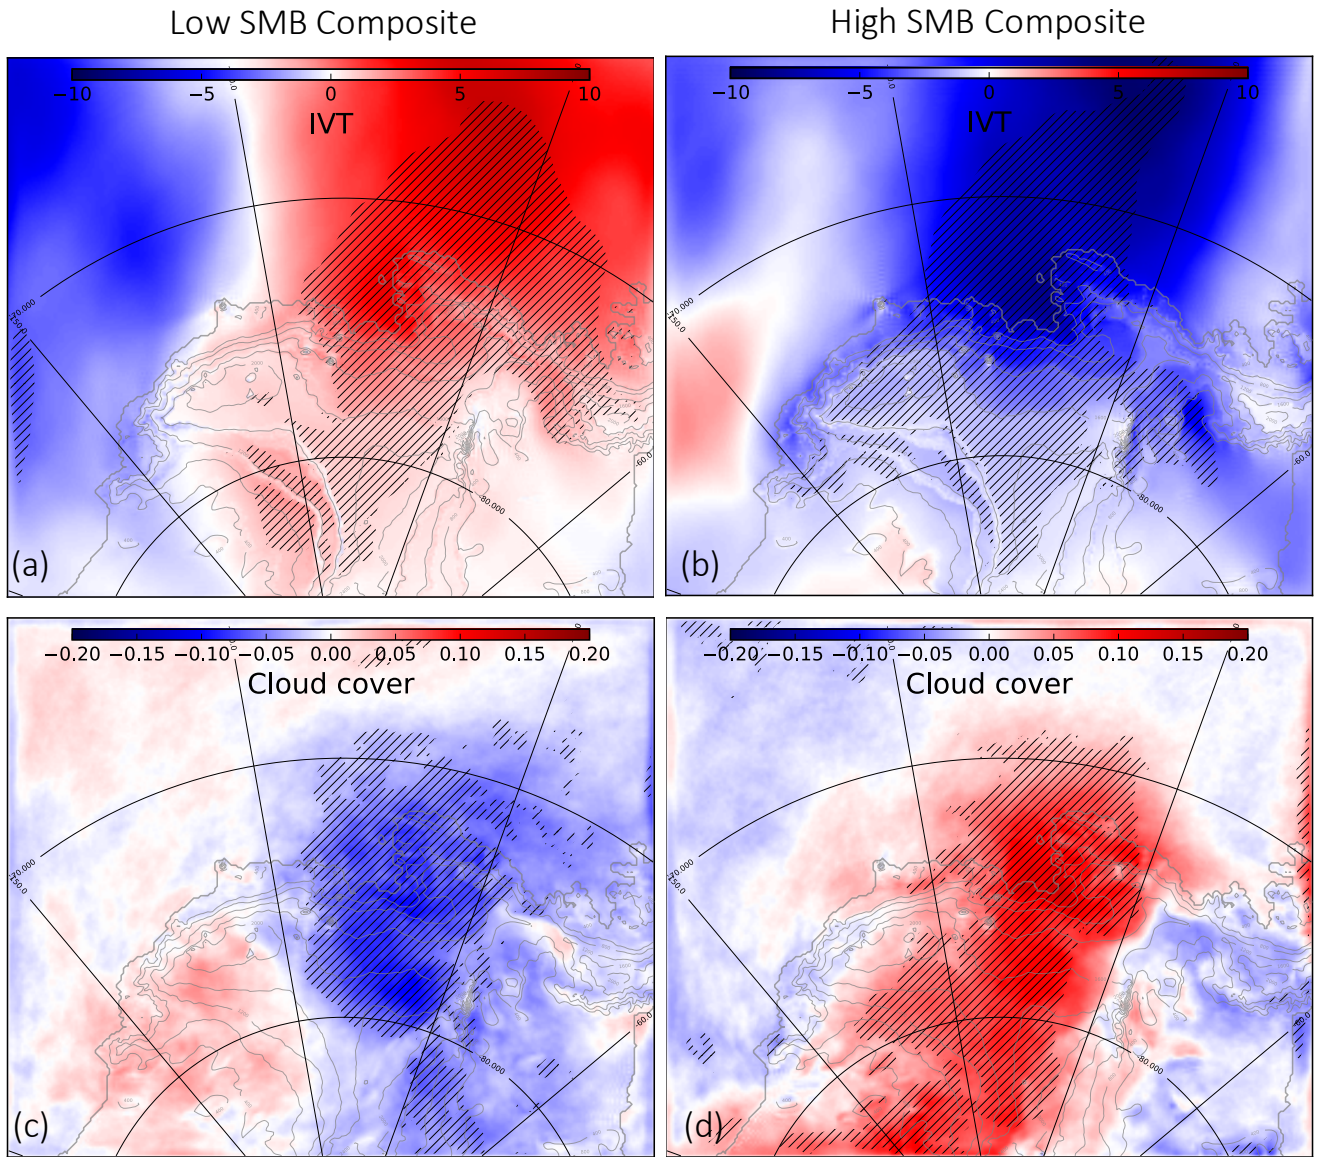

430

**Figure 10 :** (a,b) vertical Integrated Vapor Transport (IVT) along the y-axis ( $\text{kg m}^{-2}$ , negative toward the continent) calculated as  $IVT = \int_{925}^{700} q \cdot v \frac{dP}{g}$  and (c,d) cloud cover (no units, from 0 to 1) anomalies during low-SMB summers (left) and high-SMB summers (right). Anomalies are calculated as high/low composites minus the climatology over 1979-2017. Hatched area represents significance >90% calculated with a *t*-test.

435

Low surface melt composite

High surface melt composite

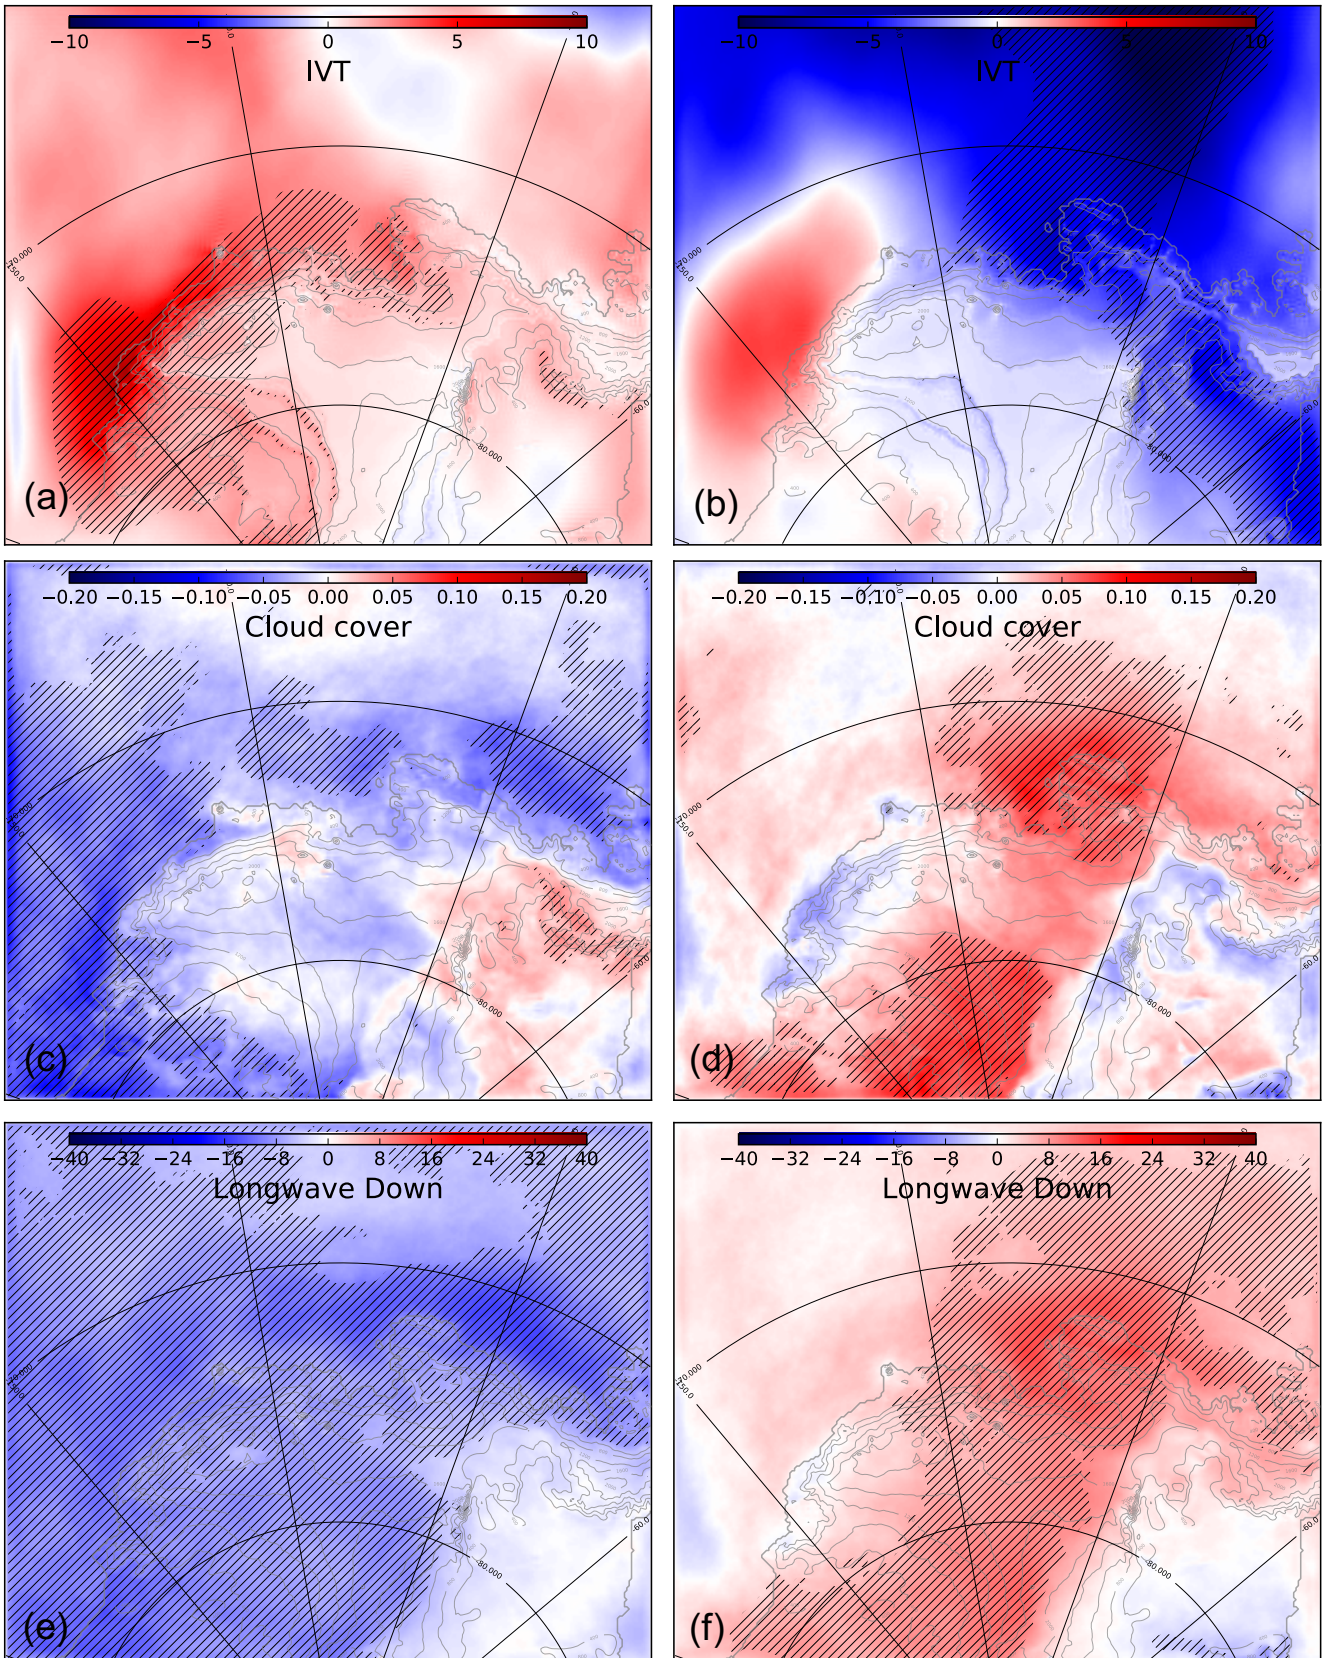

440

Figure 11 : (a,b) vertical Integrated Vapor Transport (IVT) along y axis (negative toward the continent) ( $\text{kg m}^{-2}$ ) (same formula as for SMB), (c,d) cloud cover (no units, from 0 to 1), and (e,f) downward longwave radiation ( $\text{W m}^{-2}$ ) anomalies during low-melt summers (left) and high-melt summers (right). Anomalies are calculated as high/low composites minus the climatology over 1979-2017. Hatched area represents significance  $>90\%$  calculated with a  $t$ -test.

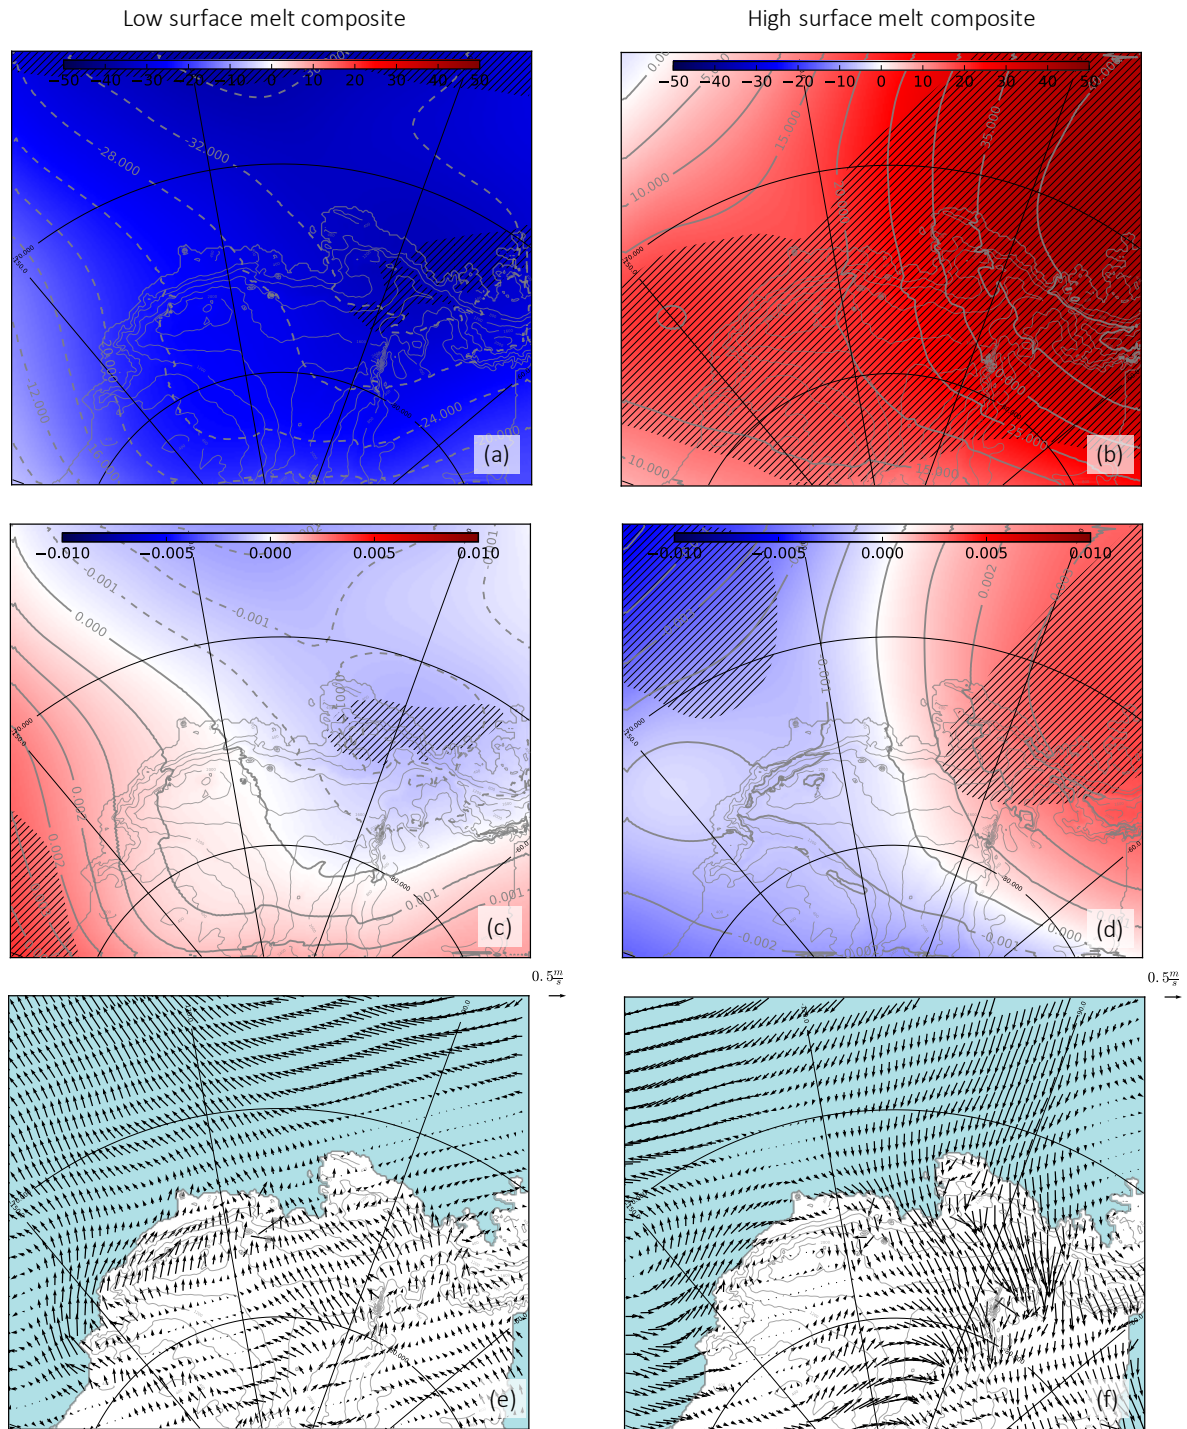

445

Figure 12 : (a,b) 500 hPa geopotential height (m) and (c,d) 500 hPa geopotential height divided by the domain-averaged value for each season and (e,f) 10m wind ( $\text{m s}^{-1}$ ) anomalies during low-melt summers (left) and high-melt summers (right). Anomalies are calculated as high/low composites minus the climatology over 1979-2017. Hatched area represents significance >90% calculated with a  $t$ -test.

450

Now that we have described the mechanisms in play for summers with high and low SMB or surface melt rates, we investigate the connections between the leading modes of climate variability (ENSO, SAM and ASL variability) and summer SMB and surface melting over the individual Amundsen drainage basins (shown in Fig.1).

455

In line with the previous composite analysis for high and low SMB composites, the SMB in all the drainage basins is anti-correlated to the ASL longitudinal position (Table 3, 4<sup>th</sup> column). This anti-

correlation has little statistical significance for Abbot and Cosgrove, but for Dotson and Thwaites, the ASL longitudinal position explains nearly 40% of the SMB interannual variance (explained variance given by square correlations). The ENSO-SMB relationship has moderate levels of statistical significance, with positive SMB correlations to -SOI for all basins, but a part of SMB variance explained by ENSO that remains below 16% (Table 3, 2<sup>nd</sup> column). -SOI and the ASL longitudinal location are not significantly connected together (Table 1), therefore their connection to SMB can be considered as independent from each other. Finally, the SMB is significantly correlated to neither the ASL relative central pressure (Table 3, 5<sup>th</sup> row) nor the SAM index (Table 3, 3<sup>rd</sup> column) for all the basins. To better describe interplays, we also calculate a multi-linear regression of SMB on the 4 indices (last column of Tab. 3). Accounting for several indices increases the explained SMB variance compared to a single index, indicating an interplay of the ASL and ENSO. Overall, 16 to 49% of the summer SMB variance (increasing westward) can be explained by a linear combination of the climate indices.

470

**Table 3 : Correlation R between ENSO, SAM, and ASL indices and the SMB over individual drainage basins in austral summer. The statistical significance (t-test) is written within brackets. The last column shows the correlation of a multi-linear regression to the 4 indices using a least absolute shrinkage and selection operator (LASSO, Tibshirani, 1996)**

| Drainage Basins | -SOI vs SMB | SAM index vs SMB | ASL longitudinal location vs SMB | ASL relative central pressure vs SMB | multi-linear regression |
|-----------------|-------------|------------------|----------------------------------|--------------------------------------|-------------------------|
| Abbot           | 0.25 (87%)  | 0.14 (59%)       | -0.15 (65%)                      | -0.01 (3%)                           | 0.40                    |
| Cosgrove        | 0.26 (88%)  | 0.16 (65%)       | -0.21(80%)                       | 0.08 (36%)                           | 0.46                    |
| Pine Island     | 0.32 (95%)  | 0.03 (17%)       | -0.25 (87%)                      | -0.17 (69%)                          | 0.47                    |
| Thwaites        | 0.33 (96%)  | 0.02 (8%)        | -0.45 (99%)                      | -0.10 (47%)                          | 0.57                    |
| Crosson         | 0.40 (99%)  | -0.00 (2%)       | -0.53 (99%)                      | -0.14 (60%)                          | 0.66                    |
| Dotson          | 0.36 (97%)  | 0.00 (2%)        | -0.61 (99%)                      | 0.15 (65%)                           | 0.70                    |
| Getz            | 0.30 (93%)  | -0.15 (62%)      | -0.64 (99%)                      | 0.27 (90%)                           | 0.68                    |

475

We now investigate similar relationships, but with surface melt rates instead of SMB. By contrast to SMB, the surface melt connection to the ASL relative central pressure is stronger than its connection to the ASL longitudinal position (Table 4, 4<sup>th</sup> and 5<sup>th</sup> columns), which again highlights the two distinct mechanisms explaining high/low melt rates vs high/low SMB. The part of the melt rate variance explained by the ASL relative central pressure increases westward, from 12% for Abbot to 21% for Getz. Even though the effect of the ASL central pressure dominates, there is still a moderate anti-correlation between melt rates and the ASL longitudinal position, suggesting that the mechanism explaining high/low SMB can explain a small part of the melt rate variance (less than 10%). In a similar way as SMB, SOI explains

less than 9% of the melt rate's variance, with moderate statistical significance (Table 4, 2<sup>nd</sup> column), and  
485 as for summer SMB there is no significant relationship to the SAM. We have repeated the calculations  
considering the number of melt days, and we find very similar results in terms of correlations (Table 4,  
2<sup>nd</sup> line in each row). Relatively similar conclusions can be drawn from observational estimates of number  
of melt days (values in italic in Table 4), except that satellite estimates indicate a stronger correlation to  
-SOI, even exceeding the correlation to the ASL central pressure in the case for most drainage basins (the  
490 variance explained by -SOI reaching 25%). As the SAM index is significantly anti-correlated to ENSO  
(Table 1), the stronger melt-SOI correlation in the observational products goes together with a stronger  
melt-SAM anti-correlation than in our simulations. To better describe interplays, we also calculate a  
multi-linear regression of melt rates on the 4 indices (last column of Tab. 4). Accounting for several  
indices increases the explained melt rate variance compared to a single index, which indicates an interplay  
495 of the four modes of variability. Overall, 21 to 30% of the summer melt rate variance can be explained  
by a linear combination of the climate indices.

The part of explained variance never exceeds 50% of the summer melt and SMB variance.  
Possible reasons for this are (i) the modes of variability do not explain all the variance locally; for  
example, the leading EOF of SST in the Equatorial Pacific (representing ENSO) only accounts for 50 to  
500 70% of the SST variance (e.g. Roundy, 2014) meaning that the tropical convection thought to influence  
Antarctica is not completely described by SOI or NINO3.4; (ii) assuming that a large part of the  
tropospheric circulation variability is explained by ENSO, SAM and ASL indices, there are reasons why  
the connection may be weaker for SMB and surface melting because of their non-linear dependence on  
sea ice and evaporation in coastal regions, the evolution of snow properties, etc; (iii) strong modulation  
505 of the southeast Pacific extratropical circulation by Rossby wave train is not only due to the existence of  
El Niño events but also depends on the exact spatial distribution of deep convection in the tropical central  
Pacific and to the strength of the polar jet (Harangozo, 2004) (iv) a part of the variability of SMB and  
melting may be stochastic, i.e. not necessarily driven by variability with spatio-temporal coherence at  
large scales.

510

**Table 4 : Correlation R between -SOI, SAM, and ASL indices and MAR surface melt rates (bold), MAR number of melt days (regular), number of melt days from satellite products (italic, first value for Nicolas et al. (2017) and second for Picard et al. (2007), over individual ice-shelves in summer. The statistical significance (t-test) is written within brackets. The last column shows the correlation of a multi-linear regression to the 4 indices using a least absolute shrinkage and selection operator (LASSO, Tibshirani 1996).**

| Drainage Basins | -SOI              | SAM index          | ASL longitudinal location | ASL relative central pressure | multi-linear regression |
|-----------------|-------------------|--------------------|---------------------------|-------------------------------|-------------------------|
| Abbot           | <b>0.23 (84%)</b> | <b>-0.05 (24%)</b> | <b>-0.25 (86%)</b>        | <b>0.35 (97%)</b>             | <b>0.46</b>             |
|                 | 0.25 (86%)        | -0.04 (19%)        | -0.23 (84%)               | 0.30 (93%)                    | 0.44                    |
|                 | <i>0.37 (97%)</i> | <i>-0.22 (79%)</i> | <i>-0.29 (91%)</i>        | <i>0.32 (94%)</i>             | <i>0.49</i>             |
|                 | <i>0.37 (98%)</i> | <i>-0.18 (71%)</i> | <i>-0.18 (72%)</i>        | <i>-0.24 (92%)</i>            | <i>0.47</i>             |
| Cosgrove        | <b>0.24 (86%)</b> | <b>-0.08 (36%)</b> | <b>-0.30 (93%)</b>        | <b>0.37 (98%)</b>             | <b>0.50</b>             |
|                 | 0.25 (87%)        | -0.06 (29%)        | -0.29 (92%)               | 0.32 (95%)                    | 0.47                    |
|                 | <i>0.37 (97%)</i> | <i>-0.20 (76%)</i> | <i>-0.37 (97%)</i>        | <i>0.32 (94%)</i>             | <i>0.52</i>             |
|                 | <i>0.38 (98%)</i> | <i>-0.25 (87%)</i> | <i>-0.16 (65%)</i>        | <i>0.27 (90%)</i>             | <i>0.46</i>             |
| Pine Island     | <b>0.30 (86%)</b> | <b>-0.07 (33%)</b> | <b>-0.31 (94%)</b>        | <b>0.38 (98%)</b>             | <b>0.54</b>             |
|                 | 0.29 (92%)        | -0.03 (13%)        | -0.34 (96%)               | 0.35 (97%)                    | 0.55                    |
|                 | <i>0.48 (99%)</i> | <i>-0.29 (91%)</i> | <i>-0.21 (78%)</i>        | <i>0.42 (99%)</i>             | <i>0.62</i>             |
|                 | <i>0.44 (99%)</i> | <i>-0.19 (75%)</i> | <i>-0.13 (56%)</i>        | <i>0.37 (98%)</i>             | <i>0.59</i>             |
| Thwaites        | <b>0.29 (92%)</b> | <b>-0.13 (56%)</b> | <b>-0.25 (87%)</b>        | <b>0.39 (98%)</b>             | <b>0.51</b>             |
|                 | 0.35 (95%)        | -0.11 (43%)        | -0.19 (69%)               | 0.51 (99%)                    | 0.67                    |
|                 | <i>0.48 (99%)</i> | <i>-0.23 (81%)</i> | <i>-0.11 (45%)</i>        | <i>0.29 (91%)</i>             | <i>0.55</i>             |
|                 | <i>0.44 (99%)</i> | <i>-0.28 (89%)</i> | <i>-0.06 (26%)</i>        | <i>0.26 (87%)</i>             | <i>0.52</i>             |
| Crosson         | <b>0.28 (91%)</b> | <b>-0.14 (60%)</b> | <b>-0.23 (84%)</b>        | <b>0.41 (99%)</b>             | <b>0.51</b>             |
|                 | 0.29 (86%)        | -0.08 (30%)        | -0.11 (42%)               | 0.40 (97%)                    | 0.52                    |
|                 | <i>0.48 (99%)</i> | <i>-0.35 (95%)</i> | <i>-0.20 (76%)</i>        | <i>0.39(98%)</i>              | <i>0.61</i>             |
|                 | <i>0.35 (96%)</i> | <i>-0.35 (96%)</i> | <i>-0.10 (45%)</i>        | <i>0.41 (98%)</i>             | <i>0.52</i>             |
| Dotson          | <b>0.27 (90%)</b> | <b>-0.14 (60%)</b> | <b>-0.24 (86%)</b>        | <b>0.42 (99%)</b>             | <b>0.52</b>             |
|                 | 0.26 (86%)        | -0.13 (54%)        | -0.25 (86%)               | 0.44 (99%)                    | 0.53                    |
|                 | <i>0.36 (95%)</i> | <i>-0.27 (84%)</i> | <i>-0.03 (11%)</i>        | <i>0.36 (94%)</i>             | <i>0.52</i>             |
|                 | <i>0.33 (93%)</i> | <i>-0.28 (86%)</i> | <i>0.13 (51%)</i>         | <i>0.32 (91%)</i>             | <i>0.50</i>             |
| Getz            | <b>0.22 (82%)</b> | <b>-0.16 (65%)</b> | <b>-0.26 (88%)</b>        | <b>0.46 (99%)</b>             | <b>0.53</b>             |
|                 | 0.22 (82%)        | -0.16 (67%)        | -0.29 (92%)               | 0.46 (99%)                    | 0.54                    |
|                 | <i>0.50 (99%)</i> | <i>-0.42 (99%)</i> | <i>-0.24 (84%)</i>        | <i>0.41 (99%)</i>             | <i>0.64</i>             |
|                 | <i>0.34 (96%)</i> | <i>-0.41 (98%)</i> | <i>-0.15 (63%)</i>        | <i>0.34 (96%)</i>             | <i>0.46</i>             |

## 4 Discussion

The composite analysis and the correlation of SMB and melt rates to the ASL indices gives a consistent picture. Summers tend to be associated with high SMB when the ASL migrates westward and southward because this places the northerly flow (ASL eastern flank) over the Amundsen Sea, thereby increasing the southward humidity transport and snowfall. This corresponds to the large-scale features described by Hosking et al. (2013) but is here described for the SMB of individual drainage basins. By contrast, longitudinal migrations of the ASL are not the main driver of surface melting variability, as previously noted by Deb et al. (2018). Summers tend to be associated with high surface melt rates when the Amundsen/Bellingshausen region experiences blocking, i.e. anticyclonic conditions, which tends to decrease the climatological southerly flow (western flank of the ASL), and to favor marine air intrusions that make cloud cover denser with increase downward longwave radiation, as described by Scott et al. (2019).

While the role of the ASL now appears to be quite clear, the exact impact of ENSO on SMB and surface melt rates remains elusive. Earlier studies analyzing the impact of ENSO on precipitation in West Antarctica had difficulties understanding the mechanisms and the robustness of the signal, because they had to rely on relatively short observation and reanalysis periods (Bromwich et al., 2000; Cullather et al., 1996; Genthon and Cosme, 2003). Using a dedicated SMB model over a longer time period, we have shown here that the ENSO-SMB relationship in austral summer exists, but it is relatively weak as SOI alone cannot explain more than 16% of the interannual variance in summer SMB. The relationship between ENSO and the number of melt days was identified by Deb et al. (2018) using both regional simulations and a satellite product. It was then thoroughly described by Scott et al. (2019) who found that SOI could explain 20% of the melt variance when considering all the Amundsen ice shelves together and using satellite products (correlation of 0.45 in their Table 3). While we obtain similar results as Scott et al. (2019) when using the number of melt days derived from satellite products, both the number of melt days and the melt rates simulated by MAR indicate less variance explained by SOI, that is, between 5% and 9% for the individual drainage basins. Our MAR simulations certainly contain biases in the representation of the melting process and the way it affects surface properties such as albedo and roughness, but it is also possible that the number of melt days derived from microwave satellite data is biased due to variability in surface conditions, percolation within fresh snow, meltwater ponding (observed on Pine Island, Kingslake et al., 2017), and satellite overpass time (Tedesco, 2009 ; Scott et al., 2019). More work will be needed to understand these differences.

Numerous publications have explained the remote effects of ENSO on the West Antarctic climate through Rossby wave trains that connect the convective anomalies associated with ENSO in the equatorial Pacific to Antarctica (e.g., Yuan and Martinson, 2001). However, austral winter and spring conditions are more favorable for Rossby wave trains to be formed and to propagate to high southern latitudes than summer conditions (Harangozo, 2004; Lachlan-Cope and Connolley, 2006; Ding et al., 2011 and

references therein). The poleward propagation of tropically sourced Rossby waves in summer is indeed inhibited by the strong polar front jet in the South Pacific sector at that time of the year, which leads to Rossby wave reflection away from the Amundsen Sea region (Scott Yiu and Maycock, 2019). This lack of direct connection in summer was supported by Steig et al. (2012) who found weakest correlations between NINO3.4 and wind stress anomalies in the Amundsen Sea in DJF compared to other seasons. Therefore, we investigated possible lags in the relationships to ENSO. While ENSO peaks in DJF, it starts to develop in MAM, as indicated by the growing SOI auto-correlation from 9 to 6 months lag (Fig. 13a). The first implication of this is that any signal correlated to SOI in DJF will be correlated to SOI in the previous JJA without the need for a lagged physical mechanism. Nevertheless, the correlation between SMB or melt rates in DJF and SOI in the preceding JJA is higher than the synchronous correlation for all the drainage basins (solid curves in Fig. 13b-h), which suggests that the lagged relationship is not only a simple statistical artifact. The results of Ding et al. (2011) and Steig et al. (2012) suggest that there could be a lagged mechanism whereby ENSO would influence West Antarctica in austral spring or winter, with a delayed response of SMB and melting in the following austral summer. The number of melt days derived from satellite data also gives 6-month lagged correlations to SOI that are as high or higher than synchronous correlations for most ice shelves (dashed curves in Fig. 13b-h).

We now discuss possible explanations for this lag. As mentioned previously, the Rossby wave trains connecting the Equatorial Pacific to Antarctica are expected to develop within a few weeks in response to ENSO convective anomalies (e.g. Hoskins and Karoly, 1981; Mo and Higgins, 1998; Peters and Vargin, 2015). Therefore, the lag has to come from anomalies stored in a slower medium, such as snowpack, ocean, or sea ice. Snow surface melting in DJF is neither correlated to the temperature of snow layers within the first 2m in the previous months (not shown), nor to the snow accumulated over the previous months (not shown). This indicates that heat diffusion in snow or preconditioned porosity or albedo of snow are not responsible for the 6-month lag. By contrast, we find that El Niño events in JJA significantly reduce the sea ice cover in the following DJF (Fig. 14). This is reminiscent of Clem et al., (2017) who found stronger lagged correlation between SON ENSO and DJF sea ice cover than synchronous correlation in DJF, with consequences on summer air temperatures. We suggest two possible explanations for this lagged ENSO-sea-ice relationship. First, it could be slowly advected from the Ross Sea. Pope et al., (2017) indeed found that El Niño events developing in MAM created a dipole of sea ice anomalies, with decreased (increased) concentration in the Ross Sea (Amundsen and Bellingshausen Seas). Using a novel sea ice budget analysis, they showed that the decreased concentration in the Ross Sea was then advected eastward, reaching the Amundsen Sea in SON and DJF. There is also another possible pathway for lagged ENSO/sea-ice relationship. The zonal wind stress over the Amundsen Sea continental shelf break is a good proxy for the transport of Circumpolar Deep Water (CDW) onto the continental shelf (Thoma et al., 2008; Holland et al., 2019). Steig et al., (2012) noted significant correlations between that wind stress and ENSO in JJA and SON but not in DJF. All these studies as well



as Paolo et al., (2018) pointed out scales of a few months for the buildup and advection of CDW on the continental shelf then into the ice shelf cavities where they produce basal melting, and Paolo et al., (2018) reported correlations between ENSO and ice shelf thinning 6 months later. As stronger ice-shelf melt rates tend to decrease sea ice in this region due to the entrainment of warm CDW towards the surface (Jourdain et al., 2017; Merino et al., 2018), the connection through CDW intrusions may also explain a part of the lag between ENSO and DJF sea ice in the Amundsen Sea. We suggest that both mechanisms (eastward advection of sea ice anomalies and anomalous intrusions of CDW) may explain the 6-month lag between DJF SMB or melting and ENSO, and we leave the details of the ocean/sea-ice processes for future research.

Beyond the ASL and ENSO, we also find that the SAM is not significantly related to summer SMB and surface melt over individual drainage basins at interannual time scales, which agrees with Deb et al. (2018). This may appear contradictory to the results obtained by Medley and Thomas (2019), showing that the positive SAM trend from 1957 to 2000 largely explains the pattern of annual SMB trends over the Antarctic ice sheet. First of all, their residual SMB trend (i.e. not related to SAM) is particularly strong in the Amundsen Sea Embayment (their Fig. 1e), highlighting that only a part of the SMB trend in that region may be related to the SAM trend. The multi-decadal SAM trend is also related to ozone depletion and emissions of greenhouse gases, and the interannual SAM variability may have different characteristics and impacts on SMB. Furthermore, the absence of SMB-SAM relationship in our MAR simulations is specific to the austral summer (that represent 15% of the annual SMB), and correlations are more significant for the other seasons (Tab.S3 in supplementary material). Therefore, the significant SAM-SMB relationship suggested by Medley and Thomas (2009) for annual SMB are not necessarily in contradictory to our results. Lastly, previous studies have suggested that the SAM-ENSO anti-correlation may diminish the impact of ENSO on surface melting and SMB. Partial correlations used to disentangle the SAM and ENSO influences on SMB do indicate a slightly stronger SMB-ENSO correlation when the effect of SAM is removed (in particular for Abbot and Cosgrove, see 2<sup>nd</sup> and 3<sup>rd</sup> columns of Table 5), but the effect is relatively small. For melt rates, the SAM modulation is very weak for all the basins (Table 5, 4<sup>th</sup> and 5<sup>th</sup> columns).

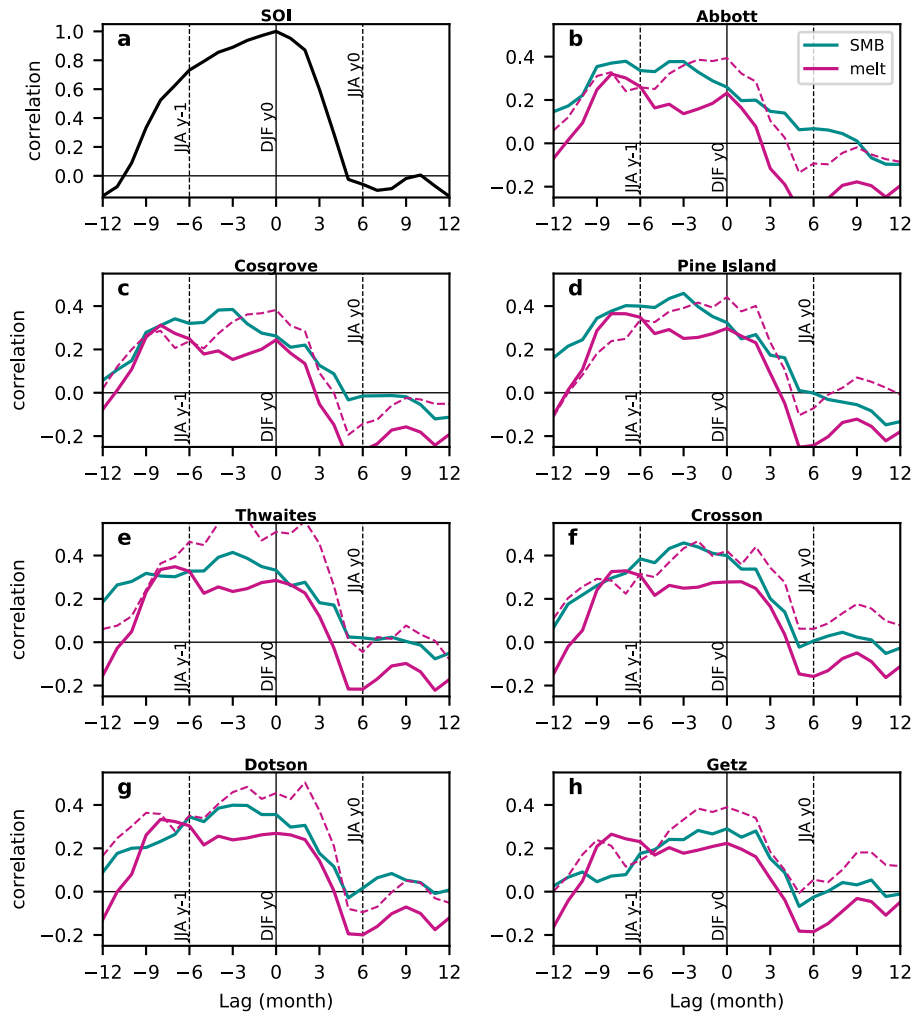

625

Figure 13 : Correlation between lagged 3-month averaged -SOI (i.e. DJF at zero lag, previous JJA at -6 lag) and (a) DJF SOI, (b-h) simulated SMB and melt rates in individual drainage basins. The dashed curves correspond to the number of melt days derived from satellite data by Picard et al. (2007).

**Table 5 : Partial Correlation of -SOI vs SMB or melt rates, removing the influence of SAM (columns 2 and 4). Corresponding full correlations are indicated in columns 3 and 5 (same as Table 3 and Table 4).**

| Drainage Basins | Partial correlation -SOI vs SMB (without SAM) | -SOI vs SMB | -SOI vs SMB | Partial correlation -SOI vs surface melt (without SAM) | Correlation -SOI vs surface melt |
|-----------------|-----------------------------------------------|-------------|-------------|--------------------------------------------------------|----------------------------------|
| Abbot           | 0.36                                          | 0.25        | 0.21        | 0.23                                                   | 0.23                             |
| Cosgrove        | 0.37                                          | 0.26        | 0.21        | 0.23                                                   | 0.24                             |
| Pine Island     | 0.38                                          | 0.32        | 0.26        | 0.30                                                   | 0.30                             |
| Thwaites        | 0.38                                          | 0.33        | 0.23        | 0.25                                                   | 0.29                             |
| Crosson         | 0.45                                          | 0.40        | 0.29        | 0.24                                                   | 0.28                             |
| Dotson          | 0.40                                          | 0.36        | 0.25        | 0.23                                                   | 0.27                             |
| Getz            | 0.26                                          | 0.30        | 0.18        | 0.17                                                   | 0.22                             |

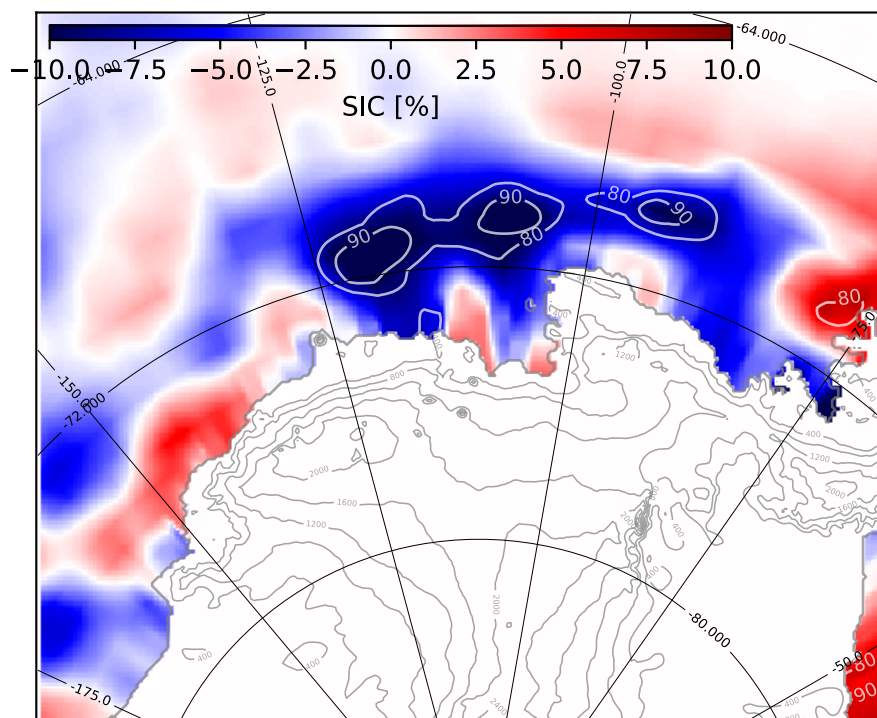

**Figure 14 : Summer sea ice cover (%) anomaly (composites minus the climatology over 1979-2017) during El Niño events in JJA (6 month before). Contours represent significance with a *t*-test.**

We now discuss the relationship between surface melt and SMB. According to Table 2, runoff is null over all drainage basins which mean that the firn is never saturated. All surface melt and rainfall refreeze within the annual snow layer. Surface melt needed to deplete all the air in the annual snow layer and lead to hydrofracturing can be defined as  $snowfall * [\rho_{water} / \rho_{snow}] * [1 - (\rho_{snow} / \rho_{ice})]$ , with snowfall in water equivalent, a fresh snow density of  $300 \text{ kg m}^{-3}$  and ice density of  $920 \text{ kg m}^{-3}$ . This indicates that meltwater ponding and complex surface hydrological flows are unlikely to develop over West Antarctic drainage basins with such amount of precipitation and surface water needed (between 991 and 2205 mm.w.e yr<sup>-1</sup> depending on the drainage basin). This would prevent surface hydrological flows, melt water ponding and ice-shelf collapse from hydrofracturing.

## 5 Conclusion

In this paper we have analyzed possible drivers for summer surface melt and SMB interannual variability over the last decades in the Amundsen sector, West Antarctica. For this, we have simulated the 1979 to 2017 period with the regional atmospheric model, MAR. We have first evaluated our model configuration in comparison to observational products (i.e. AWS, airborne-radar and firn-core SMB, melt days from satellite microwave, and melt rates from satellite scatterometer). MAR gives good results for near-surface temperatures (mean overestimation of  $0.10^\circ\text{C}$ ), near-surface wind speeds (mean underestimation of  $0.42 \text{ m s}^{-1}$ ), and SMB (local relative bias  $< 20\%$  over the Thwaites basin). The mean surface melt rate over the Amundsen Sea region is underestimated by 18% compared to the estimates derived from QuickSCAT (Trusel et al., 2013), and the interannual variability of surface melting is relatively well reproduced in terms of melt rate ( $R=0.80$ ) or number of melt days ( $R=0.43$  to  $0.69$  depending on the satellite product) as also found by previous study using the same MAR version (i.e. Datta et al., 2019). Similar underestimation was also found in another regional atmospheric model of the Amundsen region (underestimation of 30–50% found by Lenaerts et al., 2017). Overall, our results indicate that MAR is a suitable tool to study interannual variability in the Amundsen sector.

Then, we have analyzed the interannual variability of summer SMB. The strongest summer SMB occurs over Thwaites and Pine Island glaciers when the ASL migrates far westward (by typically  $30^\circ$ ) and southward (by typically  $3\text{--}4^\circ$ ). This promotes a southward flow on the Eastern flank of the ASL, towards the glaciers, with resulting increased moisture convergence, precipitation, and therefore SMB. Our study hence provides further support for the connection between Antarctic precipitation and the ASL longitudinal position that was previously described by Hosking et al. (2013) based on the ERA-interim reanalysis. In terms of climate indices, this corresponds to an anti-correlation between SMB and the ASL longitudinal position. This anti-correlation is found for all the drainage basins of the Amundsen Sea Embayment, and the part of the SMB variance explained by the ASL longitudinal migrations ranges from 2 % to 41 % (increasing westward). A small part of the SMB variance is also related to ENSO, with higher

SMB during El Niño events and lower SMB during La Niña, but less than 8% of the SMB variance is explained by ENSO variability. This SMB connection to ENSO is independent from its connection the ASL longitudinal position.

We have also analyzed the interannual variability of summer surface melt rates. Strongest surface melting occurs over Thwaites and Pine Island glaciers when the ASL undergoes an anticyclonic anomaly (likely the signature of blocking activity), which is visible through anomalies of the ASL relative central pressure. Such an anomaly promotes a southward anomaly of near-surface winds anomaly and moisture convergence over the Amundsen Sea Embayment. As recently described by Scott et al. (2019), this leads to increased cloud cover and downward longwave radiation, which in turns increases surface melting. As for SMB, we do not find that surface melt rate variability in our simulations is strongly connected to ENSO as it does not explain more than 9% of the total variance in simulated summer surface melt rate (or 12% of the number of melt days). By contrast and for unknown reasons, the variance in number of melt days derived from satellite products indicates that as much as 25% of the variance in these products could be explained by -SOI.

We also suggest that at least a part of the ENSO-SMB and ENSO-melt relationships in summer is inherited from the previous austral winter (JJA). Rossby wave trains generated by convective anomalies related to developing El Niño events in austral winter significantly affect the Antarctic region and we suggest that this has some impact on SMB and surface melting in the Amundsen sector 6 months later. Such delay could either be related to sea ice anomalies generated by ENSO in the Ross Sea in austral winter and taking 6 months to be advected to the Amundsen Sea (Pope et al., 2017), or to marine intrusions of Circumpolar Deep Water that are favored by El Niño events in austral winter (Steig et al., 2012). Circumpolar Deep Water may take 6 months to reach ice shelf cavities where increased basal melting favors the entrainment of this water towards the ocean surface (Jourdain et al., 2017).

We lastly propose that the rate of surface water production (rainfall + melting) would need to increase by nearly two orders of magnitude to saturate present-day annual snow layer and therefore to initiate hydrofracturing. This is possible for strong warming scenarios given the exponential temperature dependence described by Trusel et al., (2015) , although snowfall is also expected to increase (Krinner et al., 2008; Agosta et al., 2013; Ligtenberg et al., 2013; Lenaerts et al., 2016; Palerme et al., 2017), requiring even more meltwater to reach saturation.

700 **Code and data availability:** The MAR code (version 3.9.1) is available on the MAR website  
(<http://mar.cnrs.fr/>), outputs from the Amundsen simulation presented in this study are available on  
<https://doi.org/10.5281/zenodo.2815907>.

**Author contributions:** The study was designed by Marion Donat-Magnin and Nicolas C. Jourdain. Set-  
705 up of the MAR domain configuration was made by Marion Donat-Magnin, Cécile Agosta, Amine Drira  
and Nicolas C. Jourdain. Cécile Agosta, Xavier Fettweis, Hubert Gallée, Christoph Kittel and Charles  
Amory developed and tuned the MAR model for Antarctica, and they contributed to improving and  
interpreting our simulations. Christoph Kittel developed the scripts used to compare MAR to AWS data.  
Jonathan D. Wille and Vincent Favier contributed to the interpretation of our results related to  
710 interannual variability. All the authors significantly contributed to this manuscript.

**Competing interests:** The authors declare that they have no conflict of interests.

**Acknowledgements:** This work was funded by the French National Research Agency (ANR) through  
715 the TROIS-AS (ANR-15-CE01-0005-01) project. The development of MAR was partly funded by Labex  
OSUG@2020 (ANR10 LABX56) through the “Tout le Monde se MAR” project. All the computations  
presented in this paper were performed using the GRICAD infrastructure ([https://gricad.univ-grenoble-  
alpes.fr](https://gricad.univ-grenoble-alpes.fr)), which is partly supported by the Equip@Meso project (ANR-10-EQPX-29-01) of the program  
“Investissements d'Avenir” supervised by ANR, by the Rhône-Alpes region (GRANT CPER07\_13  
720 CIRA: <http://www.ci-ra.org>) and by France-Grilles (<http://www.france-grilles.fr>). We thank G. Picard,  
L.Trusel, J. Nicolas, Y. Wang and B.Medley for making their data available.

## References

- 725 Agosta, C., Favier, V., Krinner, G., Gallée, H., Fettweis, X. and Genthon, C.: High-resolution modelling of the Antarctic surface mass balance, application for the twentieth, twenty first and twenty second centuries, *Climate dynamics*, 41(11–12), 3247–3260, doi:10.1007/s00382-013-1903-9, 2013.
- 730 Agosta, C., Amory, C., Kittel, C., Orsi, A., Favier, V., Gallée, H., Broeke, M., Lenaerts, J., Wessem, J. and Fettweis, X.: Estimation of the Antarctic surface mass balance using MAR (1979–2015) and identification of dominant processes, *The Cryosphere Discussions*, 1–22, doi:https://doi.org/10.5194/tc-13-281-2019, 2019.
- 735 Amory, C., Trouvilliez, A., Gallée, H., Favier, V., Naaim-Bouvet, F., Genthon, C., Agosta, C., Piard, L. and Bellot, H.: Comparison between observed and simulated aeolian snow mass fluxes in Adélie Land, East Antarctica, *The Cryosphere Discussions*, (9), 1373–1383, doi:https://doi.org/10.5194/tc-9-1373-2015, 2015.
- 740 Asay-Davis, X. S., Jourdain, N. C. and Nakayama, Y.: Developments in simulating and parameterizing interactions between the Southern Ocean and the Antarctic Ice sheet, *Current Climate Change Reports*, 3(4), 316–329, doi:https://doi.org/10.1007/s40641-017-0071-0, 2017.
- 745 Bell, R. E., Banwell, A. F., Trusel, L. D. and Kingslake, J.: Antarctic surface hydrology and impacts on ice-sheet mass balance, *Nature Climate Change*, 1, doi:https://doi.org/10.1038/s41558-018-0326-3, 2018.
- 750 Bracegirdle, T. J., Connolley, W. M. and Turner, J.: Antarctic climate change over the twenty first century, *Journal of Geophysical Research (Atmospheres)*, 113, doi:https://doi.org/10.1029/2007jd008933, 2008.
- 755 Van den Broeke, M.: Strong surface melting preceded collapse of Antarctic Peninsula ice shelf: Melting on Antarctic ice shelves, *Geophysical Research Letters*, 32(12), doi:10.1029/2005GL023247, 2005.
- 760 Bromwich, D. H., Rogers, A. N., Källberg, P., Cullather, R. I., White, J. W. and Kreutz, K. J.: ECMWF analyses and reanalyses depiction of ENSO signal in Antarctic precipitation, *Journal of Climate*, 13(8), 1406–1420, doi:https://doi.org/10.1175/15200442(2000)013<1406:EAARDO>2.0.CO;2, 2000.
- 765 Bromwich, D. H., Nicolas, J. P. and Monaghan, A. J.: An Assessment of Precipitation Changes over Antarctica and the Southern Ocean since 1989 in Contemporary Global Reanalyses, *Journal of Climate*, 24, 4189–4209, 2011.
- 770 Bromwich, D. H., Nicolas, J. P., Monaghan, A. J., Lazzara, M. A., Keller, L. M., Weidner, G. A. and Wilson, A. B.: Central West Antarctica among the most rapidly warming regions on Earth, *Nature Geoscience*, 6(2), 139–145, doi:10.1038/ngeo1671, 2013.
- 775 Brun, E., David, P., Sudul, M. and Brunot, G.: A numerical model to simulate snow-cover stratigraphy for operational avalanche forecasting, *Journal of Glaciology*, 38(128), 13–22, doi:https://doi.org/10.1017/s0022143000009552, 1992.
- 780 Cai, W., Borlace, S., Lengaigne, M., Van Rensch, P., Collins, M., Vecchi, G., Timmermann, A., Santoso, A., McPhaden, M. J., Wu, L. and others: Increasing frequency of extreme El Niño events due to greenhouse warming, *Nature climate change*, 4(2), 111, doi:https://doi.org/10.1038/nclimate2100, 2014.

- 775 Cai, W., Wang, G., Santoso, A., Lin, X. and Wu, L.: Definition of extreme El Niño and its impact on projected increase in extreme El Niño frequency, *Geophysical Research Letters*, 44(21), doi:<https://doi.org/10.1002/2017gl075635>, 2017.
- 780 Clem, K. R., Renwick, J. A. and McGregor, J.: Large-Scale Forcing of the Amundsen Sea Low and Its Influence on Sea Ice and West Antarctic Temperature, *J. Climate*, 30(20), 8405–8424, doi:10.1175/JCLI-D-16-0891.1, 2017.
- 785 Chen, G. and Held, I. M.: Phase speed spectra and the recent poleward shift of Southern Hemisphere surface westerlies, *Geophysical Research Letters*, 34(21), doi:<https://doi.org/10.1029/2007gl031200>, 2007.
- Cullather, R. I., Bromwich, D. H. and Van Woert, M. L.: Interannual variations in Antarctic precipitation related to El Niño–Southern Oscillation, *Journal of Geophysical Research: Atmospheres*, 101(D14), 19109–19118, doi:<https://doi.org/10.1029/96jd01769>, 1996.
- 790 Datta, R. T., Tedesco, M., Fettweis, X., Agosta, C., Lhermitte, S., Lenaerts, J. and Wever, N.: The Effect of Foehn-Induced Surface Melt on Firn Evolution Over the Northeast Antarctic Peninsula, *Geophysical Research Letters*, 46, doi:10.1029/2018GL080845, 2019.
- 795 De Ridder, K. and Gallée, H.: Land surface–induced regional climate change in southern Israel, *Journal of applied meteorology*, 37(11), 1470–1485, doi:[https://doi.org/10.1175/15200450\(1998\)037<1470:lsircc>2.0.co;2](https://doi.org/10.1175/15200450(1998)037<1470:lsircc>2.0.co;2), 1998.
- 800 Deb, P., Orr, A., Bromwich, D. H., Nicolas, J. P., Turner, J. and Hosking, J. S.: Summer drivers of atmospheric variability affecting ice shelf thinning in the Amundsen Sea Embayment, West Antarctica, *Geophysical Research Letters*, 45(9), 4124–4133, doi: <https://doi.org/10.1029/2018gl077092>, 2018.
- Deconto, R. M. and Pollard, D.: Contribution of Antarctica to past and future sea-level rise, *Nature*, 531, 591–597, doi:10.1038/nature17145, doi:10.1038/nature17145, 2016.
- 805 Dee, D. P., Uppala, S., Simmons, A., Berrisford, P., Poli, P., Kobayashi, S., Andrae, U., Balmaseda, M., Balsamo, G., Bauer, d P. and others: The ERA-Interim reanalysis: Configuration and performance of the data assimilation system, *Quarterly Journal of the royal meteorological society*, 137(656), 553–597, doi:<https://doi.org/10.1002/qj.493>, 2011.
- 810 Deser, C., Phillips, A. S., Tomas, R. A., Okumura, Y. M., Alexander, M. A., Capotondi, A., Scott, J. D., Kwon, Y.-O. and Ohba, M.: ENSO and Pacific Decadal Variability in the Community Climate System Model Version 4, *Journal of Climate*, 25, 2622–2651, doi:<https://doi.org/10.1175/jcli-d-11-00301.1>, 2012.
- 815 Ding, Q., Steig, E. J., Battisti, D. S. and Küttel, M.: Winter warming in West Antarctica caused by central tropical Pacific warming, *Nature Geoscience*, 4(6), 398, doi:<https://doi.org/10.1038/ngeo1129>, 2011.
- 820 Dutrieux, P., De Rydt, J., Jenkins, A., Holland, P. R., Ha, H. K., Lee, S. H., Steig, E. J., Ding, Q., Abrahamsen, E. P. and Schröder, M.: Strong sensitivity of Pine Island ice-shelf melting to climatic variability, *Science*, 343(6167), 174–178, doi: <https://doi.org/10.1126/science.1244341>, 2014.
- 825 Edwards, T. L., Brandon, M. A., Durand, G., Edwards, N. R., Gолledge, N. R., Holden, P. B., Nias, I. J., Payne, A. J., Ritz, C. and Wernecke, A.: Revisiting Antarctic ice loss due to marine ice-cliff instability, *Nature*, 566(7742), 58, doi:<https://doi.org/10.1038/s41586-019-0901-4>, 2019.
- Favier, L., Durand, G., Cornford, S., Gudmundsson, G., Gagliardini, O., Gillet-Chaulet, F., Zwinger, T.,



- 830 Payne, A. and Le Brocq, A.: Retreat of Pine Island Glacier controlled by marine ice-sheet instability, *Nature Climate Change*, 4(2), 117–121, doi: <https://doi.org/10.1038/nclimate2094>, 2014.
- Favier, V., Agosta, C., Parouty, S., Durand, G., Delaygue, G., Gallee, H., Drouet, A. S., Trouvilliez, A. and Krinner, G.: An updated and quality controlled surface mass balance dataset for Antarctica, *The Cryosphere*, 7(2), 583–597, doi:10.5194/tc-7-583-2013, 2013.
- 835 Favier, V., Krinner, G., Amory, C., Gallée, H., Beaumet, J. and Agosta, C.: Antarctica-Regional Climate and Surface Mass Budget, *Current Climate Change Reports*, 3(4), 303–315, <https://doi.org/10.1007/s40641-017-0072-z>, 2017.
- 840 Fettweis, X., Box, J., Agosta, C., Amory, C., Kittel, C., Lang, C., van As, D., Machguth, H. and Gallée, H.: Reconstructions of the 1900–2015 Greenland ice sheet surface mass balance using the regional climate MAR model, *Cryosphere (The)*, 11, 1015–1033, doi:<https://doi.org/10.5194/tc-2016-268>, 2017.
- Fogt, R. L. and Wovrosh, A. J.: The Relative Influence of Tropical Sea Surface Temperatures and Radiative Forcing on the Amundsen Sea Low, *Journal of Climate*, 28(21), 8540–8555, doi: <https://doi.org/10.1175/jcli-d-15-0091.1>, 2015.
- 845 Fogt, R. L., Bromwich, D. H. and Hines, K. M.: Understanding the SAM influence on the South Pacific ENSO teleconnection, *Climate Dynamics*, 36, 1555–1576, doi: <https://doi.org/10.1007/s00382-010-0905-0>, 2011.
- 850 Fretwell, P., Pritchard, H. D., Vaughan, D. G., Bamber, J. L., Barrand, N. E., Bell, R., Bianchi, C., Bingham, R. G., Blankenship, D. D., Casassa, G., Catania, G., Callens, D., Conway, H., Cook, A. J., Corr, H. F. J., Damaske, D., Damm, V., Ferraccioli, F., Forsberg, R., Fujita, S., Gim, Y., Gogineni, P., Griggs, J. A., Hindmarsh, R. C. A., Holmlund, P., Holt, J. W., Jacobel, R. W., Jenkins, A., Jokat, W., Jordan, T., King, E. C., Kohler, J., Krabill, W., Riger-Kusk, M., Langley, K. A., Leitchenkov, G., 855 Leuschen, C., Luyendyk, B. P., Matsuoka, K., Mouginot, J., Nitsche, F. O., Nogi, Y., Nost, O. A., Popov, S. V., Rignot, E., Rippin, D. M., Rivera, A., Roberts, J., Ross, N., Siegert, M. J., Smith, A. M., Steinhage, D., Studinger, M., Sun, B., Tinto, B. K., Welch, B. C., Wilson, D., Young, D. A., Xiangbin, C. and Zirizzotti, A.: Bedmap2: improved ice bed, surface and thickness datasets for Antarctica, *The Cryosphere*, 7(1), 375–393, doi:10.5194/tc-7-375-2013, 2013.
- 860 Fyke, J., Lenaerts, J. and Wang, H.: Basin-scale heterogeneity in Antarctic precipitation and its impact on surface mass variability, *The Cryosphere*, 11(6), 2595–2609, doi:<https://doi.org/10.5194/tc-11-2595-2017>, 2017.
- 865 Gallée, H.: Simulation of the mesocyclonic activity in the Ross Sea, Antarctica, *Monthly Weather Review*, 123(7), 2051–2069, doi:[https://doi.org/10.1175/1520-0493\(1995\)123<2051:sotmai>2.0.co;2](https://doi.org/10.1175/1520-0493(1995)123<2051:sotmai>2.0.co;2), 1995.
- Gallée, H. and Gorodetskaya, I. V.: Validation of a limited area model over Dome C, Antarctic Plateau, 870 during winter, *Climate dynamics*, 34(1), 61, doi:<https://doi.org/10.1007/s00382-008-0499-y>, 2010.
- Gallée, H. and Schayes, G.: Development of a three-dimensional meso- $\gamma$  primitive equation model: katabatic winds simulation in the area of Terra Nova Bay, Antarctica, *Monthly Weather Review*, 122(4), 671–685, doi:[https://doi.org/10.1175/1520-0493\(1994\)122<0671:doatdm>2.0.co;2](https://doi.org/10.1175/1520-0493(1994)122<0671:doatdm>2.0.co;2), 1994.
- 875 Gallée, H., Preunkert, S., Argentini, S., Frey, M., Genthon, C., Jourdain, B., Pietroni, I., Casasanta, G., Barral, H., Vignon, E. and others: Characterization of the boundary layer at Dome C (East Antarctica) during the OPALE summer campaign, *Atmospheric Chemistry and Physics*, 15(11), 6225–6236, doi:<https://doi.org/10.5194/acpd-14-33089-2014>, 2015.
- 880 Genthon, C. and Cosme, E.: Intermittent signature of ENSO in west-Antarctic precipitation,

- Geophysical Research Letters, 30, doi:<https://doi.org/10.1029/2003gl018280>, 2003.
- 885 Harangozo, S. A.: The relationship of Pacific deep tropical convection to the winter and springtime extratropical atmospheric circulation of the South Pacific in El Niño events, *Geophysical Research Letters*, 31(5), doi:[10.1029/2003GL018667](https://doi.org/10.1029/2003GL018667), 2004.
- 890 Hartmann, D. L. and Lo, F.: Wave-driven zonal flow vacillation in the Southern Hemisphere, *Journal of the Atmospheric Sciences*, 55(8), 1303–1315, doi: [https://doi.org/10.1175/1520-0469\(1998\)055<1303:wzfv>2.0.co;2](https://doi.org/10.1175/1520-0469(1998)055<1303:wzfv>2.0.co;2), 1998.
- 895 Holland, P. R., Bracegirdle, T. J., Dutrieux, P., Jenkins, A. and Steig, E. J.: West Antarctic ice loss influenced by internal climate variability and anthropogenic forcing, *Nature Geoscience*, 12(9), 718–724, doi:[10.1038/s41561-019-0420-9](https://doi.org/10.1038/s41561-019-0420-9), 2019.
- 900 Hosking, J. S., Orr, A., Marshall, G. J., Turner, J. and Phillips, T.: The influence of the Amundsen–Bellingshausen Seas low on the climate of West Antarctica and its representation in coupled climate model simulations, *Journal of Climate*, 26(17), 6633–6648, doi: <https://doi.org/10.1175/jcli-d-12-00813.1>, 2013.
- 905 Hosking, J. S., Orr, A., Bracegirdle, T. J. and Turner, J.: Future circulation changes off West Antarctica: Sensitivity of the Amundsen Sea Low to projected anthropogenic forcing, *Geophysical Research Letters*, 43(1), 367–376, doi:<https://doi.org/10.1002/2015gl067143>, 2016.
- 910 Hoskins, B. J. and Karoly, D. J.: The steady linear response of a spherical atmosphere to thermal and orographic forcing, *Journal of the Atmospheric Sciences*, 38(6), 1179–1196, doi:[https://doi.org/10.1175/1520-0469\(1981\)038<1179:tslroa>2.0.co;2](https://doi.org/10.1175/1520-0469(1981)038<1179:tslroa>2.0.co;2), 1981.
- 915 Huai, B., Wang, Y., Ding, M., Zhang, J. and Dong, X.: An assessment of recent global atmospheric reanalyses for Antarctic near surface air temperature, *Atmospheric Research*, 226, 181–191, doi:[10.1016/j.atmosres.2019.04.029](https://doi.org/10.1016/j.atmosres.2019.04.029), 2019.
- Izumo, T., Vialard, J., Lengaigne, M., de Boyer Montegut, C., Behera, S. K., Luo, J.-J., Cravatte, S., Masson, S. and Yamagata, T.: Influence of the state of the Indian Ocean Dipole on the following year's El Niño, *Nature Geoscience*, 3(3), 168, doi:<http://dx.doi.org/10.1038/ngeo760>, 2010.
- 920 Jacobs, S., Jenkins, A., Hellmer, H., Giulivi, C., Nitsche, F., Huber, B. and Guerrero, R.: The Amundsen Sea and the Antarctic ice sheet, *Oceanography*, 25(3), 154–163, doi: <https://doi.org/10.5670/oceanog.2012.90>, 2012.
- Jenkins, A., Dutrieux, P., Jacobs, S., Steig, E. J., Gudmundsson, G. H., Smith, J. and Heywood, K. J.: Decadal Ocean Forcing and Antarctic Ice Sheet Response: Lessons from the Amundsen Sea, *Oceanography*, 29(4), 106–117, 2016.
- 925 Jenkins, A., Shoosmith, D., Dutrieux, P., Jacobs, S., Kim, T. W., Lee, S. H., Ha, H. K. and Stammerjohn, S.: West Antarctic Ice Sheet retreat in the Amundsen Sea driven by decadal oceanic variability, *Nature Geoscience*, 11, 733–738, doi: [10.1038/s41561-018-0207-4](https://doi.org/10.1038/s41561-018-0207-4), 2018.
- 930 Jones, J. M., Gille, S. T., Goosse, H., Abram, N. J., Canziani, P. O., Charman, D. J., Clem, K. R., Crosta, X., de Lavergne, C., Eisenman, I. and others: Assessing recent trends in high-latitude Southern Hemisphere surface climate, *Nature Climate Change*, 6(10), 917–926, doi:<https://doi.org/10.1038/nclimate3103>, 2016.
- 935 Joughin, I., Smith, B. E. and Holland, D. M.: Sensitivity of 21st century sea level to ocean-induced thinning of Pine Island Glacier, Antarctica, *Geophysical Research Letters*, 37(20),doi:

<https://doi.org/10.1029/2010gl044819>, 2010.

- 940 Joughin, I., Smith, B. E. and Medley, B.: Marine ice sheet collapse potentially under way for the Thwaites Glacier Basin, West Antarctica, *Science*, 344(6185), 735–738, doi: <https://doi.org/10.1126/science.1249055>, 2014.
- 945 Jourdain, N. C., Mathiot, P., Merino, N., Durand, G., Le Sommer, J., Spence, P., Dutrieux, P. and Madec, G.: Ocean circulation and sea-ice thinning induced by melting ice shelves in the Amundsen Sea, *Journal of Geophysical Research: Oceans*, doi: <https://doi.org/10.1002/2016jc012509>, 2017.
- Kingslake, J., Ely, J. C., Das, I. and Bell, R. E.: Widespread movement of meltwater onto and across Antarctic ice shelves, *Nature*, 544(7650), 349, doi:<https://doi.org/10.1038/nature22049>, 2017.
- 950 Kittel, C., Amory, C., Agosta, C., Delhasse, A., Doutreloup, S., Huot, P.-V., Wyard, C., Fichet, T. and Fettweis, X.: Sensitivity of the current Antarctic surface mass balance to sea surface conditions using MAR, *Cryosphere (The)*, 12, 3827–3839, doi:10.5194/tc-12-3827-2018, 2018.
- 955 Krinner, G., Guicherd, B., Ox, K., Genthon, C. and Magand, O.: Influence of Oceanic Boundary Conditions in Simulations of Antarctic Climate and Surface Mass Balance Change during the Coming Century, *Journal of Climate*, 21(5), 938–962, doi:10.1175/2007jcli1690.1, 2008.
- 960 Lang, C., Fettweis, X. and Erpicum, M.: Future projections of the climate and surface mass balance of Svalbard with the regional climate model MAR., *Cryosphere Discussions*, 9(1), doi:<https://doi.org/10.5194/tcd-9-115-2015>, 2015.
- Lachlan-Cope, T. and Connolley, W.: Teleconnections between the tropical Pacific and the Amundsen-Bellinghausens Sea: Role of the El Niño/Southern Oscillation, *Journal of Geophysical Research (Atmospheres)*, 111(D10), 2006.
- 965 Lenaerts, J., den Broeke, M., Déry, S., Meijgaard, E., Berg, W., Palm, S. P. and Sanz Rodrigo, J.: Modeling drifting snow in Antarctica with a regional climate model: 1. Methods and model evaluation, *Journal of Geophysical Research: Atmospheres*, 117(D5), doi:<https://doi.org/10.1029/2011jd016145>, 2012.
- 970 Lenaerts, J. T., Vizcaino, M., Fyke, J., Van Kampenhout, L. and van den Broeke, M. R.: Present-day and future Antarctic ice sheet climate and surface mass balance in the Community Earth System Model, *Climate Dynamics*, 47(5–6), 1367–1381, doi:10.1007/s00382-015-2907-4, 2016.
- 975 Lenaerts, J. T., Ligtenberg, S. R., Medley, B., Van de Berg, W. J., Konrad, H., Nicolas, J. P., Van Wessem, J. M., Trusel, L. D., Mulvaney, R., Tuckwell, R. J. and others: Climate and surface mass balance of coastal West Antarctica resolved by regional climate modelling, *Annals of Glaciology*, 1–13, doi:<https://doi.org/10.1017/aog.2017.42>, 2017.
- 980 Ligtenberg, S., Van de Berg, W., Van den Broeke, M., Rae, J. and Van Meijgaard, E.: Future surface mass balance of the Antarctic ice sheet and its influence on sea level change, simulated by a regional atmospheric climate model, *Climate dynamics*, 41(3–4), 867–884, <https://doi.org/10.1007/s00382-013-1749-1>, 2013.
- 985 Limpasuvan, V. and Hartmann, D. L.: Eddies and the annular modes of climate variability, *Geophysical Research Letters*, 26(20), 3133–3136, doi: <https://doi.org/10.1029/1999gl010478>, 1999.
- Marshall, G. J.: Trends in the Southern Annular Mode from observations and reanalyses, *Journal of Climate*, 16(24), 4134–4143, doi: [https://doi.org/10.1175/1520-0442\(2003\)016<4134:titsam>2.0.co;2](https://doi.org/10.1175/1520-0442(2003)016<4134:titsam>2.0.co;2) 2003.

- Medley, B. and Thomas, E.: Increased snowfall over the Antarctic Ice Sheet mitigated twentieth-century sea-level rise, *Nature Climate Change*, 9(1), 34, doi:<https://doi.org/10.1038/s41558-018-0356-x>, 2019.
- 995 Medley, B., Joughin, I., Das, S., Steig, E., Conway, H., Gogineni, S., Criscitiello, A., McConnell, J., Smith, B., Broeke, M. and others: Airborne-radar and ice-core observations of annual snow accumulation over Thwaites Glacier, West Antarctica confirm the spatiotemporal variability of global and regional atmospheric models, *Geophysical Research Letters*, 40, 3649–3654, doi:<https://doi.org/10.1002/grl.50706>, 2013.
- 1000 Medley, B., Joughin, I., Smith, B., Das, S. B., Steig, E. J., Conway, H., Gogineni, S., Lewis, C., Criscitiello, A. S., McConnell, J. R. and others: Constraining the recent mass balance of Pine Island and Thwaites glaciers, West Antarctica, with airborne observations of snow accumulation, *The Cryosphere*, 8(4), 1375–1392, doi:<https://doi.org/10.5194/tcd-8-953-2014>, 2014.
- 1005 Merino, N., Jourdain, N. C., Le Sommer, J., Goosse, H., Mathiot, P. and Durand, G.: Impact of increasing antarctic glacial freshwater release on regional sea-ice cover in the Southern Ocean, *Ocean Modelling*, 121, 76–89, doi:<https://doi.org/10.1016/j.ocemod.2017.11.009>, 2018.
- 1010 Mo, K. C. and Higgins, R. W.: The Pacific–South American Modes and Tropical Convection during the Southern Hemisphere Winter, *Monthly Weather Review*, 126(6), 1581–1596, doi:10.1175/1520-0493, 1998.
- 1015 Mouginit, J., Rignot, E. and Scheuchl, B.: Sustained increase in ice discharge from the Amundsen Sea Embayment, West Antarctica, from 1973 to 2013, *Geophysical Research Letters*, 41(5), 1576–1584, doi: <https://doi.org/10.1002/2013gl059069>, 2014.
- Newman, M., Shin, S.-I. and Alexander, M. A.: Natural variation in ENSO flavors, *Geophysical Research Letters*, 38(14), doi:<https://doi.org/10.1029/2011gl047658>, 2011.
- 1020 Nicolas, J. P. and Bromwich, D. H.: Climate of West Antarctica and Influence of Marine Air Intrusions, *J. Climate*, 24(1), 49–67, doi:10.1175/2010JCLI3522.1, 2010.
- 1025 Nicolas, J. P., Vogelmann, A. M., Scott, R. C., Wilson, A. B., Cadeddu, M. P., Bromwich, D. H., Verlinde, J., Lubin, D., Russell, L. M., Jenkinson, C. and others: January 2016 extensive summer melt in West Antarctica favoured by strong El Niño, *Nature communications*, 8, ncomms15799, doi: <https://doi.org/10.1038/ncomms15799>, 2017.
- 1030 Palerme, C., Genthon, C., Claud, C., Kay, J. E., Wood, N. B. and L’Ecuyer, T.: Evaluation of current and projected Antarctic precipitation in CMIP5 models, *Climate Dynamics*, 48, 225–239, doi:10.1007/s00382-016-3071-1, 2017.
- 1035 Paolo, F., Padman, L., Fricker, H., Adusumilli, S., Howard, S. and Siegfried, M.: Response of Pacific-sector Antarctic ice shelves to the El Niño/Southern Oscillation, *Nature Geoscience*, 11, 121–126, doi: <https://doi.org/10.1038/s41561-017-0033-0>, 2018.
- Pattyn, F., Ritz, C., Hanna, E., Asay-Davis, X., DeConto, R., Durand, G., Favier, L., Fettweis, X., Goelzer, H., Golledge, N. R. and others: The Greenland and Antarctic ice sheets under 1.5° C global warming, *Nature Climate Change*, 1, doi:<https://doi.org/10.1038/s41558-018-0305-8>, 2018.
- 1040 Peters, D. H. and Vargin, P.: Influence of subtropical Rossby wave trains on planetary wave activity over Antarctica in September 2002, *Tellus A: Dynamic Meteorology and Oceanography*, 67(1), 25875, doi:<https://doi.org/10.3402/tellusa.v67.25875>, 2015.

- Philander, S., Lau, N., Pacanowski, R. and Nath, M.: Two Different Simulations of the Southern  
1045 Oscillation and El Niño with Coupled Ocean–Atmosphere General Circulation Models, *Philosophical  
Transactions of the Royal Society of London Series A*, 329, 167–177,  
doi:<https://doi.org/10.1098/rsta.1989.0068>, 1989.
- Picard, G. and Fily, M.: Surface melting observations in Antarctica by microwave radiometers:  
1050 Correcting 26-year time series from changes in acquisition hours, *Remote sensing of environment*,  
104(3), 325–336, doi:<https://doi.org/10.1016/j.rse.2006.05.010>, 2006.
- Picard, G., Fily, M. and Gallée, H.: Surface melting derived from microwave radiometers: a climatic  
indicator in Antarctica, *Annals of Glaciology*, 46, 29–34,  
1055 doi:<https://doi.org/10.3189/172756407782871684>, 2007.
- Pope, J. O., Holland, P. R., Orr, A., Marshall, G. J. and Phillips, T.: The impacts of El Niño on the  
observed sea ice budget of West Antarctica, *Geophysical Research Letters*, doi:  
1060 <https://doi.org/10.1002/2017gl073414>, 2017.
- Pritchard, H., Ligtenberg, S., Fricker, H., Vaughan, D., Van den Broeke, M. and Padman, L.: Antarctic  
ice-sheet loss driven by basal melting of ice shelves, *Nature*, 484(7395), 502–505, doi:  
<https://doi.org/10.1038/nature10968>, 2012.
- Raphael, M., Marshall, G., Turner, J., Fogt, R., Schneider, D., Dixon, D., Hosking, J., Jones, J. and  
1065 Hobbs, W.: The Amundsen Sea low: Variability, change, and impact on Antarctic climate, *Bulletin of  
the American Meteorological Society*, 97(1), 111–121, doi: <https://doi.org/10.1175/bams-d-14-00018.1>,  
2016.
- Raphael, M. N. and Hobbs, W.: The influence of the large-scale atmospheric circulation on Antarctic  
1070 sea ice during ice advance and retreat seasons, *Geophysical Research Letters*, 41(14), 5037–5045,  
doi:<https://doi.org/10.1002/2014gl060365>, 2014.
- Rignot, E., Mouginot, J., Scheuchl, B., van den Broeke, M., van Wessem, M. J. and Morlighem, M.:  
1075 Four decades of Antarctic Ice Sheet mass balance from 1979–2017, *Proceedings of the National  
Academy of Sciences*, 116(4), 1095–1103, <https://doi.org/10.1073/pnas.1812883116>, 2019.
- Ritz, C., Edwards, T. L., Durand, G., Payne, A. J., Peyaud, V. and Hindmarsh, R. C.: Potential sea-level  
rise from Antarctic ice-sheet instability constrained by observations, *Nature*, 528(7580), 115–118, doi:  
1080 <https://doi.org/10.1038/nature16147>, 2015.
- Ropelewski, C. F. and Jones, P. D.: An Extension of the Tahiti–Darwin Southern Oscillation Index,  
*Monthly Weather Review*, 115(9), 2161–2165, doi:10.1175/1520-  
0493(1987)115<2161:AEOTTS>2.0.CO;2, 1987.
- 1085 Roundy, P. E.: On the Interpretation of EOF Analysis of ENSO, Atmospheric Kelvin Waves, and the  
MJO, *J. Climate*, 28(3), 1148–1165, doi:10.1175/JCLI-D-14-00398.1, 2014.
- Scambos, T., Fricker, H. A., Liu, C.-C., Bohlander, J., Fastook, J., Sargent, A., Massom, R. and Wu, A.-  
1090 M.: Ice shelf disintegration by plate bending and hydro-fracture: Satellite observations and model  
results of the 2008 Wilkins ice shelf break-ups, *Earth and Planetary Science Letters*, 280, 51–60,  
doi:10.1016/j.epsl.2008.12.027, 2009.
- Schoof, C.: Ice sheet grounding line dynamics: Steady states, stability, and hysteresis, *Journal of  
1095 Geophysical Research: Earth Surface*, 112(F3), doi: <https://doi.org/10.1029/2006jf000664>, 2007.
- Scott, R. C., Nicolas, J. P., Bromwich, D. H., Norris, J. R. and Lubin, D.: Meteorological Drivers and

- Large-Scale Climate Forcing of West Antarctic Surface Melt, *Journal of Climate*, 32(3), 665–684, doi:<https://doi.org/10.1175/jcli-d-18-0233.1>, 2019.
- 1100 Scott Yiu, Y. Y. and Maycock, A. C.: On the Seasonality of the El Niño Teleconnection to the Amundsen Sea Region, *J. Climate*, 32(15), 4829–4845, doi:10.1175/JCLI-D-18-0813.1, 2019.
- Seroussi, H., Nakayama, Y., Larour, E., Menemenlis, D., Morlighem, M., Rignot, E. and Khazendar, A.: Continued retreat of Thwaites Glacier, West Antarctica, controlled by bed topography and ocean circulation, *Geophysical Research Letters*, n/a–n/a, doi:10.1002/2017GL072910, 2017.
- 1105 Shepherd, A. and Nowicki, S.: Improvements in ice-sheet sea-level projections, *Nature Climate Change*, 7, 672–674, 2017.
- 1110 Shepherd, A., Ivins, E., Rignot, E., Smith, B., van den Broeke, M., Velicogna, I., Whitehouse, P., Briggs, K., Joughin, I., Krinner, G. and others: Mass balance of the Antarctic ice sheet from 1992 to 2017., *Nature.*, doi: <https://doi.org/10.1038/nclimate3400>, 2018.
- 1115 Steig, E. J., Schneider, D. P., Rutherford, S. D., Mann, M. E., Comiso, J. C. and Shindell, D. T.: Warming of the Antarctic ice-sheet surface since the 1957 International Geophysical Year, *Nature*, 457(7228), 459–462, doi:10.1038/nature07669, 2009.
- 1120 Steig, E. J., Ding, Q., Battisti, D. and Jenkins, A.: Tropical forcing of Circumpolar Deep Water inflow and outlet glacier thinning in the Amundsen Sea Embayment, West Antarctica, *Annals of Glaciology*, 53(60), 19–28, doi: <https://doi.org/10.3189/2012aog60a110>, 2012.
- 1125 St-Laurent, P., Yager, P., Sherrell, R., Stammerjohn, S. and Dinniman, M.: Pathways and supply of dissolved iron in the Amundsen Sea (Antarctica), *Journal of Geophysical Research: Oceans*, 122(9), 7135–7162, doi:<https://doi.org/10.1002/2017JC013162>, 2017.
- Tedesco, M.: Assessment and development of snowmelt retrieval algorithms over Antarctica from K-band spaceborne brightness temperature (1979–2008), *Remote Sensing of Environment*, 113(5), 979–997, doi:10.1016/j.rse.2009.01.009, 2009.
- 1130 Thoma, M., Jenkins, A., Holland, D. and Jacobs, S.: Modelling circumpolar deep water intrusions on the Amundsen Sea continental shelf, Antarctica, *Geophysical Research Letters*, 35(18), doi: <https://doi.org/10.1029/2008gl034939>, 2008.
- 1135 Thomas, E. R., Hosking, J. S., Tuckwell, R. R., Warren, R. A. and Ludlow, E. C.: Twentieth century increase in snowfall in coastal West Antarctica, *Geophysical Research Letters*, 42(21), 9387–9393, doi:10.1002/2015GL065750, 2015.
- 1140 Thompson, D. W. and Wallace, J. M.: Annular modes in the extratropical circulation. Part I: month-to-month variability\*, *Journal of Climate*, 13(5), 1000–1016, doi: [https://doi.org/10.1175/1520-0442\(2000\)013<1000:amitec>2.0.co;2](https://doi.org/10.1175/1520-0442(2000)013<1000:amitec>2.0.co;2), 2000.
- 1145 Torinesi, O., Fily, M. and Genthon, C.: Variability and trends of the summer melt period of Antarctic ice margins since 1980 from microwave sensors, *Journal of Climate*, 16(7), 1047–1060, doi:[https://doi.org/10.1175/1520-0442\(2003\)016<1047:vatots>2.0.co;2](https://doi.org/10.1175/1520-0442(2003)016<1047:vatots>2.0.co;2), 2003.
- Trusel, L. D., Frey, K. E. and Das, S. B.: Antarctic surface melting dynamics: Enhanced perspectives from radar scatterometer data, *Journal of Geophysical Research: Earth Surface*, 117(F2), doi:10.1029/2011JF002126, 2012.
- 1150 Trusel, L. D., Frey, K. E., Das, S. B., Munneke, P. K. and Broeke, M. R.: Satellite-based estimates of

Antarctic surface meltwater fluxes, *Geophysical Research Letters*, 40(23), 6148–6153, doi:<https://doi.org/10.1002/2013gl058138>, 2013.

- 1155 Trusel, L. D., Frey, K. E., Das, S. B., Karnauskas, K. B., Munneke, P. K., Van Meijgaard, E. and Van Den Broeke, M. R.: Divergent trajectories of Antarctic surface melt under two twenty-first-century climate scenarios, *Nature Geoscience*, 8(12), 927, <https://doi.org/10.1038/ngeo2563>, 2015.
- 1160 Turner, J., Hosking, J. S., Phillips, T. and Marshall, G. J.: Temporal and spatial evolution of the Antarctic sea ice prior to the September 2012 record maximum extent, *Geophysical Research Letters*, 40(22), 5894–5898, doi:[10.1002/2013GL058371](https://doi.org/10.1002/2013GL058371), 2013b.
- 1165 Turner, J., Comiso, J. C., Marshall, G. J., Lachlan-Cope, T. A., Bracegirdle, T., Maksym, T., Meredith, M. P., Wang, Z. and Orr, A.: Non-annular atmospheric circulation change induced by stratospheric ozone depletion and its role in the recent increase of Antarctic sea ice extent, *Geophysical Research Letters*, 36(8), doi: <https://doi.org/10.1029/2009gl037524>, 2009.
- 1170 Turner, J., Phillips, T., Hosking, J. S., Marshall, G. J. and Orr, A.: The Amundsen Sea low, *International Journal of Climatology*, 33(7), 1818–1829, doi:<https://doi.org/10.1002%2Fjoc.3558>, 2013a.
- Turner, J., Hosking, J. S., Phillips, T. and Marshall, G. J.: Temporal and spatial evolution of the Antarctic sea ice prior to the September 2012 record maximum extent, *Geophysical Research Letters*, 40(22), 5894–5898, doi:[10.1002/2013GL058371](https://doi.org/10.1002/2013GL058371), 2013b.
- 1175 Turner, J., Orr, A., Gudmundsson, G. H., Jenkins, A., Bingham, R. G., Hillenbrand, C.-D. and Bracegirdle, T. J.: Atmosphere-Ocean-Ice Interactions in the Amundsen Sea Embayment, West Antarctica, *Reviews of Geophysics*, doi:<https://doi.org/10.1002/2016rg000532> 2017.
- 1180 Vaughan, D. G., Marshall, G. J., Connolley, W. M., Parkinson, C., Mulvaney, R., Hodgson, D. A., King, J. C., Pudsey, C. J. and Turner, J.: Recent Rapid Regional Climate Warming on the Antarctic Peninsula, *Climatic Change*, 60(3), 243–274, doi:[10.1023/A:1026021217991](https://doi.org/10.1023/A:1026021217991), 2003.
- 1185 Wang, Y., Ding, M., van Wessem, J. M., Schlosser, E., Altnau, S., van den Broeke, M. R., Lenaerts, J. T. M., Thomas, E. R., Isaksson, E., Wang, J. and Sun, W.: A Comparison of Antarctic Ice Sheet Surface Mass Balance from Atmospheric Climate Models and In Situ Observations, *Journal of Climate*, 29(14), 5317–5337, doi:[10.1175/JCLI-D-15-0642.1](https://doi.org/10.1175/JCLI-D-15-0642.1), 2016.
- 1190 Weertman, J.: Stability of the junction of an ice sheet and an ice shelf, *Journal of Glaciology*, 13, 3–11, doi: <https://doi.org/10.3189/s0022143000023327>, 1974.
- Yuan, X. and Martinson, D. G.: The Antarctic dipole and its predictability, *Geophysical Research Letters*, 28(18), 3609–3612, doi:<https://doi.org/10.1029/2001gl012969>, 2001.
